# Supplementary material for: Degradation mechanism of 2-fluoropropene by Cl atoms: experimental and theoretical products distribution studies
Source: Royal Society of Chemistry journal article supplement (doi:10.1039/d1cp03214c), 2021-12-24
Supplement: d1cp03214c1.pdf [file d1cp03214c1.pdf]

## SUPPORTING INFORMATION.

### TROPOSPHERIC DEGRADATION OF 2-FLUOROPROPENE BY CHLORINE ATOMS: PRODUCT QUANTIFICATION AND THEORETICAL STUDIES

Cynthia B. Rivela<sup>a</sup>, Alejandro L. Cardona<sup>a</sup>, María B. Blanco<sup>a</sup>, Ian Barnes<sup>b†</sup>, Martina Kieninger<sup>c</sup>, Oscar N. Ventura<sup>c</sup> and Mariano A. Teruel<sup>a\*</sup>

<sup>a</sup>Instituto de Investigaciones en Físicoquímica de Córdoba (I.N.F.I.Q.C.), CONICET, Dpto. de Físicoquímica, Facultad de Ciencias Químicas, Universidad Nacional de Córdoba. Ciudad Universitaria, 5000 Córdoba, Argentina.

<sup>b</sup>Physikalische Chemie/FBC, Bergische Universitaet Wuppertal, Wuppertal, Germany.

<sup>c</sup>CCBG-Detema, Facultad de Química, Universidad de la República, 11200 Montevideo, Uruguay

\* Corresponding author: Mariano A. Teruel (mteruel@fcq.unc.edu.ar).

†Deceased 1 January 2018

#### Contents.

|             |                                                                                  |    |
|-------------|----------------------------------------------------------------------------------|----|
| <b>I.</b>   | Energies, geometries, and vibrations of the species reported in this paper. .... | 2  |
| <b>A.</b>   | Reactants. ....                                                                  | 2  |
| <b>B.</b>   | Pathway I. ....                                                                  | 4  |
| <b>C.</b>   | Pathway II. ....                                                                 | 10 |
| <b>D.</b>   | Pathway III. ....                                                                | 16 |
| <b>E.</b>   | Products. ....                                                                   | 23 |
| <b>II.</b>  | Summary of energies of the three reaction paths, energies (kcal/mol).....        | 29 |
| <b>A.</b>   | Energies for the final products. ....                                            | 29 |
| <b>B.</b>   | Energies for the products of the first dimerization. ....                        | 30 |
| <b>C.</b>   | Energies for the products of the dimerization processes. ....                    | 31 |
| <b>III.</b> | Change in energy and the intrinsic reaction coordinate (IRC) .....               | 33 |

I. Energies, geometries, and vibrations of the species reported in this paper.

A. Reactants.

| 2-FP                                                                              |             |           |             |                                |            |           |
|-----------------------------------------------------------------------------------|-------------|-----------|-------------|--------------------------------|------------|-----------|
| 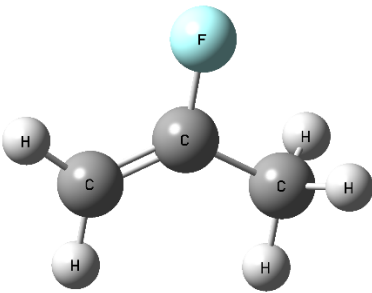 |             |           |             |                                |            |           |
| Method                                                                            | Ee          |           | E+ZPE       | $\Delta H$                     | $\Delta G$ |           |
| BMK/6-31G(d,p)                                                                    | -217.0254   |           | -216.9525   | -216.947                       | -216.9792  |           |
| BMK/6-311++G(2df.2dp)                                                             | -217.0982   |           | -217.0256   | -217.0201                      | -217.0522  |           |
| M06/6-31G(d,p)                                                                    | -217.0224   |           | -216.9503   | -216.9448                      | -216.9769  |           |
| M06/6-311++G(2df.2dp)                                                             | -217.0947   |           | -217.0229   | -217.0175                      | -217.0496  |           |
| M06-2X/DG3/aug-cc-pVTZ                                                            | -217.1432   |           | -217.0705   | -217.065                       | -217.0972  |           |
| G4                                                                                | -217.105619 |           | -217.034553 | -217.02902                     | -217.06127 |           |
| SVECV-f12                                                                         | -217.1201   |           | -217.0474   | -217.0419                      | -217.0741  |           |
| Coordinates (xyz)                                                                 |             |           |             | Vibrations (cm <sup>-1</sup> ) |            |           |
| C                                                                                 | 0.925363    | -1.043001 | 0.000000    | 212.2233                       | 1055.0877  | 3137.5893 |
| C                                                                                 | 0.000000    | 0.107922  | 0.000000    | 397.5942                       | 1288.7123  | 3160.2626 |
| C                                                                                 | 0.284665    | 1.394784  | 0.000000    | 475.9973                       | 1376.5772  | 3260.3371 |
| H                                                                                 | 1.960293    | -0.706449 | 0.000000    | 489.7479                       | 1414.8473  | 49.008808 |
| H                                                                                 | 0.755378    | -1.668198 | 0.879424    | 747.9489                       | 1444.9335  | 74.375051 |
| H                                                                                 | 0.755378    | -1.668198 | -0.879424   | 870.1089                       | 1459.5183  |           |
| F                                                                                 | -1.283044   | -0.285669 | 0.000000    | 872.7437                       | 1756.2147  |           |
| H                                                                                 | -0.499082   | 2.138840  | 0.000000    | 953.44                         | 3026.5843  |           |
| H                                                                                 | 1.315261    | 1.716797  | 0.000000    | 1014.9953                      | 3093.0402  |           |

| Cl                     |             |  |             |             |             |
|------------------------|-------------|--|-------------|-------------|-------------|
| Method                 | Ee          |  | E+ZPE       | $\Delta H$  | $\Delta G$  |
| BMK/6-31G(d,p)         | -459.990592 |  | -459.990592 | -459.988231 | -460.006269 |
| BMK/6-311++G(2df.2dp)  | -460.023364 |  | -460.023364 | -460.021003 | -460.039041 |
| M06/6-31G(d,p)         | -460.100069 |  | -460.100069 | -460.097708 | -460.115746 |
| M06/6-311++G(2df.2dp)  | -460.127832 |  | -460.127832 | -460.125472 | -460.143509 |
| M06-2X/DG3/aug-cc-pVTZ | -460.141208 |  | -460.141208 | -460.138847 | -460.156885 |
| G4                     | -460.015052 |  | -460.015052 | -460.012692 | -460.030729 |

|           |             |             |             |             |
|-----------|-------------|-------------|-------------|-------------|
| SVECV-f12 | -460.043466 | -460.043466 | -460.041106 | -460.059143 |
|-----------|-------------|-------------|-------------|-------------|

**O<sub>2</sub>**

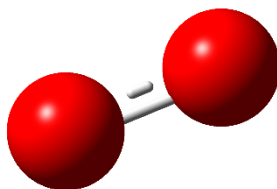

| Method                 | Ee          | E+ZPE       | ΔH                             | ΔG          |
|------------------------|-------------|-------------|--------------------------------|-------------|
| BMK/6-31G(d,p)         | -150.252676 | -150.248648 | -150.245341                    | -150.268619 |
| BMK/6-311++G(2df.2dp)  | -150.304078 | -150.300076 | -150.296769                    | -150.32003  |
| M06/6-31G(d,p)         | -150.248288 | -150.24436  | -150.241054                    | -150.264326 |
| M06/6-311++G(2df.2dp)  | -150.299304 | -150.295421 | -150.292115                    | -150.31537  |
| M06-2X/DG3/aug-cc-pVTZ | -150.324795 | -150.320798 | -150.317492                    | -150.340738 |
| G4                     | -150.282393 | -150.278657 | -150.27535                     | -150.298623 |
| SVECV-f12              | -150.303471 | -150.303471 | -150.301111                    | -150.319148 |
| Coordinates (xyz)      |             |             | Vibrations (cm <sup>-1</sup> ) |             |
| O                      | 0.000000    | 0.000000    | 0.595652                       | 1714.0895   |
| O                      | 0.000000    | 0.000000    | -0.595652                      |             |

**B.** Pathway I.

| PCR-E1                                                                             |             |           |           |                                |             |             |
|------------------------------------------------------------------------------------|-------------|-----------|-----------|--------------------------------|-------------|-------------|
| 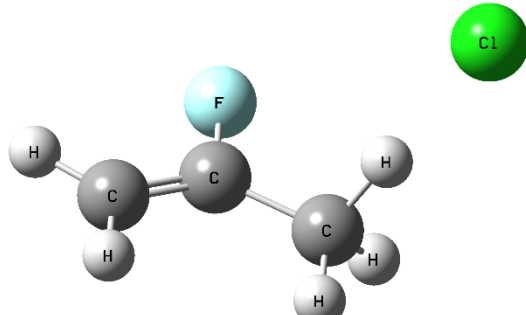 |             |           |           |                                |             |             |
| Method                                                                             | Ee          |           |           | E+ZPE                          | $\Delta H$  | $\Delta G$  |
| BMK/6-31G(d,p)                                                                     | -677.029483 |           |           | -676.962345                    | -676.954026 | -676.996323 |
| BMK/6-311++G(2df.2dp)                                                              | -677.140196 |           |           | -677.073417                    | -677.064937 | -677.108098 |
| M06/6-31G(d,p)                                                                     | -677.129371 |           |           | -677.058357                    | -677.05058  | -677.091597 |
| M06/6-311++G(2df.2dp)                                                              | -677.228917 |           |           | -677.158337                    | -677.150579 | -677.192158 |
| M06-2X/DG3/aug-cc-pVTZ                                                             | -677.286922 |           |           | -677.214417                    | -677.208215 | -677.245149 |
| G4                                                                                 | -677.118674 |           |           | -677.050507                    | -677.042886 | -677.083191 |
| SVECV-f12                                                                          | -677.16463  |           |           | -677.092125                    | -677.085923 | -677.122857 |
| Coordinates (xyz)                                                                  |             |           |           | Vibrations (cm <sup>-1</sup> ) |             |             |
| C                                                                                  | -0.432960   | 1.008813  | 0.688149  | 21.2388                        | 960.1392    | 3081.3522   |
| C                                                                                  | -1.326910   | 0.024774  | 0.075665  | 47.7569                        | 992.7272    | 3161.9648   |
| C                                                                                  | -2.306423   | 0.254159  | -0.804754 | 168.2112                       | 1017.6305   | 3165.1764   |
| H                                                                                  | -0.711423   | 2.035729  | 0.444628  | 258.7179                       | 1287.7709   | 3266.9521   |
| H                                                                                  | -0.354996   | 0.868488  | 1.770779  | 404.8833                       | 1329.8893   |             |
| H                                                                                  | 0.614019    | 0.838814  | 0.305041  | 476.0385                       | 1355.5728   |             |
| F                                                                                  | -1.075020   | -1.223676 | 0.467960  | 493.9472                       | 1383.7401   |             |
| H                                                                                  | -2.912194   | -0.560777 | -1.185009 | 716.1847                       | 1442.0111   |             |
| H                                                                                  | -2.508068   | 1.264142  | -1.141398 | 883.0243                       | 1659.415    |             |
| Cl                                                                                 | 2.349741    | -0.068223 | -0.244708 | 888.0066                       | 2518.6603   |             |

**TSE1**

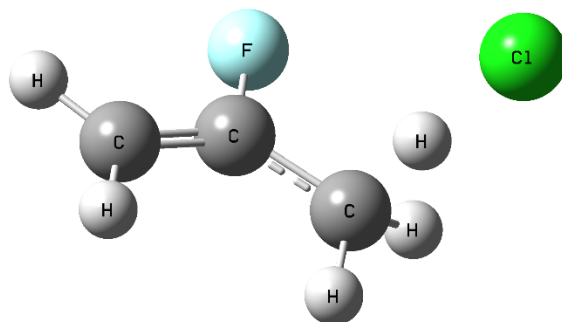

| Method                 | Ee          | E+ZPE       | $\Delta H$  | $\Delta G$                     |           |           |
|------------------------|-------------|-------------|-------------|--------------------------------|-----------|-----------|
| BMK/6-31G(d,p)         | -677.015807 | -676.94263  | -676.935567 | -676.975165                    |           |           |
| BMK/6-311++G(2df.2dp)  | -677.121545 | -677.048685 | -677.041654 | -677.081113                    |           |           |
| M06/6-31G(d,p)         | -677.127715 | -677.062157 | -677.055035 | -677.094018                    |           |           |
| M06/6-311++G(2df.2dp)  | -677.228042 | -677.162311 | -677.155255 | -677.194257                    |           |           |
| M06-2X/DG3/aug-cc-pVTZ | -677.284297 | -677.214124 | -677.206907 | -677.247439                    |           |           |
| G4                     | -677.119078 | -677.050567 | -677.042945 | -677.083237                    |           |           |
| SVECV-f12              | -677.168772 | -677.098599 | -677.091382 | -677.131914                    |           |           |
| Coordinates (xyz)      |             |             |             | Vibrations (cm <sup>-1</sup> ) |           |           |
| C                      | -0.242297   | 0.151803    | 1.076289    | <i>i</i> 633.1684              | 902.4778  | 3092.2116 |
| C                      | -1.293184   | 0.023082    | 0.107773    | 54.38                          | 962.1886  | 3157.2222 |
| C                      | -1.975568   | 1.020405    | -0.467466   | 70.9674                        | 965.2004  | 3186.8297 |
| H                      | -0.188457   | 1.126392    | 1.551674    | 373.5677                       | 1005.624  | 3265.626  |
| H                      | -0.154082   | -0.682859   | 1.767922    | 416.8261                       | 1192.4098 |           |
| H                      | 0.822592    | 0.077898    | 0.468009    | 471.776                        | 1247.2428 |           |
| F                      | -1.557862   | -1.228230   | -0.253421   | 508.8619                       | 1370.879  |           |
| H                      | -2.745476   | 0.817267    | -1.197982   | 601.0094                       | 1381.7013 |           |
| H                      | -1.758031   | 2.042752    | -0.197036   | 684.3191                       | 1456.0498 |           |
| Cl                     | 2.300618    | 0.029464    | -0.259493   | 870.9699                       | 1614.3766 |           |

**E1**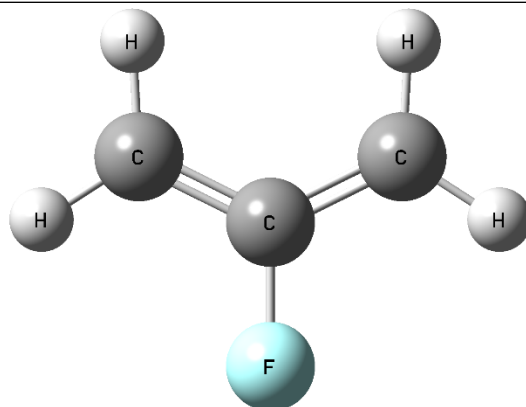

| Method                 | Ee          | E+ZPE       | $\Delta H$  | $\Delta G$                     |           |           |
|------------------------|-------------|-------------|-------------|--------------------------------|-----------|-----------|
| BMK/6-31G(d,p)         | -216.373248 | -216.31458  | -216.309385 | -216.341447                    |           |           |
| BMK/6-311++G(2df.2dp)  | -216.446624 | -216.388016 | -216.38286  | -216.414854                    |           |           |
| M06/6-31G(d,p)         | -216.372037 | -216.313916 | -216.308678 | -216.340792                    |           |           |
| M06/6-311++G(2df.2dp)  | -216.444445 | -216.38656  | -216.381349 | -216.41341                     |           |           |
| M06-2X/DG3/aug-cc-pVTZ | -216.490534 | -216.432122 | -216.426933 | -216.458972                    |           |           |
| G4                     | -216.451032 | -216.393681 | -216.388405 | -216.420581                    |           |           |
| SVECV-f12              | -216.46573  | -216.407318 | -216.402129 | -216.434168                    |           |           |
| Coordinates (xyz)      |             |             |             | Vibrations (cm <sup>-1</sup> ) |           |           |
| C                      | 1.226949    | 0.652768    | 0.000000    | 413.1732                       | 935.3222  | 3268.434  |
| C                      | 0.000000    | 0.043256    | -0.000002   | 482.7068                       | 1005.9078 | 3270.2172 |
| C                      | -1.226949   | 0.652768    | 0.000000    | 499.4644                       | 1292.8992 |           |
| H                      | 2.134807    | 0.067442    | 0.000001    | 562.1007                       | 1350.5345 |           |
| H                      | 1.287643    | 1.730872    | 0.000002    | 627.9122                       | 1453.9961 |           |
| F                      | 0.000000    | -1.298820   | 0.000001    | 735.4493                       | 1491.2517 |           |
| H                      | -2.134807   | 0.067442    | 0.000001    | 774.0538                       | 3155.6415 |           |
| H                      | -1.287643   | 1.730871    | 0.000003    | 929.6553                       | 3160.0545 |           |

**E1O2**

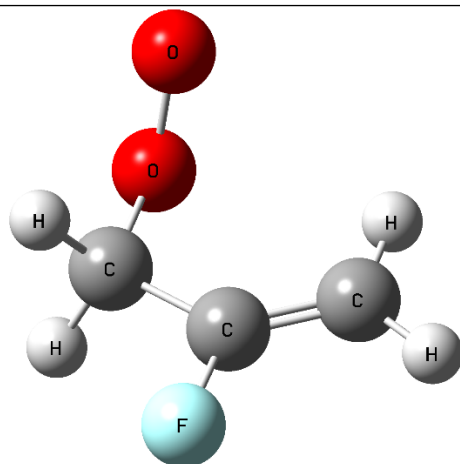

| Method                 | Ee          | E+ZPE       | $\Delta H$  | $\Delta G$                     |           |           |
|------------------------|-------------|-------------|-------------|--------------------------------|-----------|-----------|
| BMK/6-31G(d,p)         | -366.662667 | -366.592771 | -366.585661 | -366.623856                    |           |           |
| BMK/6-311++G(2df.2dp)  | -366.78486  | -366.708993 | -366.708049 | -366.74611                     |           |           |
| M06/6-31G(d,p)         | -366.654471 | -366.585516 | -366.578408 | -366.616458                    |           |           |
| M06/6-311++G(2df.2dp)  | -366.775862 | -366.707183 | -366.700098 | -366.738086                    |           |           |
| M06-2X/DG3/aug-cc-pVTZ | -366.850257 | -366.780359 | -366.77325  | -366.811592                    |           |           |
| G4                     | -366.768168 | -366.700415 | -366.693129 | -366.731954                    |           |           |
| SVECV-f12              | -366.802486 | -366.732588 | -366.725479 | -366.763821                    |           |           |
| Coordinates (xyz)      |             |             |             | Vibrations (cm <sup>-1</sup> ) |           |           |
| C                      | 0.875846    | 1.393163    | -0.150169   | 82.3312                        | 946.7268  | 3032.7844 |
| C                      | 0.877650    | 0.085606    | -0.028785   | 117.7006                       | 976.3219  | 3091.9511 |
| H                      | 1.792695    | 1.953066    | -0.035550   | 262.2168                       | 1050.9583 | 3166.4422 |
| H                      | -0.043044   | 1.918279    | -0.359576   | 396.6908                       | 1208.6836 | 3270.5464 |
| F                      | 2.000298    | -0.591946   | 0.234197    | 460.6003                       | 1247.1123 |           |
| C                      | -0.257413   | -0.868102   | -0.148150   | 472.5447                       | 1278.628  |           |
| H                      | -0.067042   | -1.584296   | -0.951593   | 585.9016                       | 1379.7013 |           |
| H                      | -0.410646   | -1.412845   | 0.786910    | 751.6509                       | 1389.846  |           |
| O                      | -1.472294   | -0.199365   | -0.499068   | 889.1344                       | 1429.1191 |           |
| O                      | -2.059099   | 0.29803     | 0.5509      | 894.9373                       | 1764.0664 |           |

**E1O**

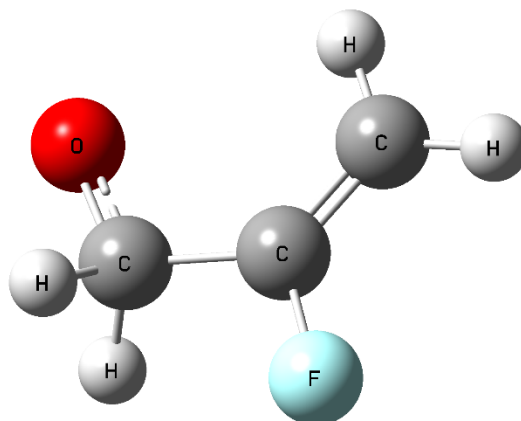

| Method                 | Ee          | E+ZPE       | $\Delta H$                     | $\Delta G$  |           |           |
|------------------------|-------------|-------------|--------------------------------|-------------|-----------|-----------|
| BMK/6-31G(d,p)         | -291.535039 | -291.471533 | -291.465339                    | -291.500507 |           |           |
| BMK/6-311++G(2df.2dp)  | -291.632437 | -291.569299 | -291.563096                    | -291.59828  |           |           |
| M06/6-31G(d,p)         | -291.529507 | -291.467562 | -291.461089                    | -291.496752 |           |           |
| M06/6-311++G(2df.2dp)  | -291.62656  | -291.564349 | -291.558126                    | -291.593329 |           |           |
| M06-2X/DG3/aug-cc-pVTZ | -291.686107 | -291.623166 | -291.616801                    | -291.652269 |           |           |
| G4                     | -291.622304 | -291.560823 | -291.554507                    | -291.589918 |           |           |
| SVECV-f12              | -291.64703  | -291.584089 | -291.577724                    | -291.613192 |           |           |
| Coordinates (xyz)      |             |             | Vibrations (cm <sup>-1</sup> ) |             |           |           |
| C                      | -0.760604   | 1.345937    | 0.000000                       | 124.5179    | 942.4237  | 2879.1718 |
| C                      | -0.489752   | 0.060874    | 0.000000                       | 256.6793    | 1107.345  | 3162.3834 |
| H                      | -1.780342   | 1.702426    | 0.000000                       | 409.9778    | 1127.2291 | 3266.8251 |
| H                      | 0.056891    | 2.051303    | -0.000001                      | 436.0779    | 1231.7149 |           |
| F                      | -1.458001   | -0.864943   | 0.000001                       | 538.8267    | 1301.779  |           |
| C                      | 0.853743    | -0.592523   | 0.000000                       | 582.6683    | 1369.402  |           |
| H                      | 0.931915    | -1.296492   | 0.855443                       | 759.228     | 1402.7502 |           |
| H                      | 0.931914    | -1.296494   | -0.855441                      | 887.6122    | 1759.0641 |           |
| O                      | 1.920164    | 0.217251    | -0.000001                      | 895.0447    | 2866.7744 |           |



**FCCH<sub>2</sub>**

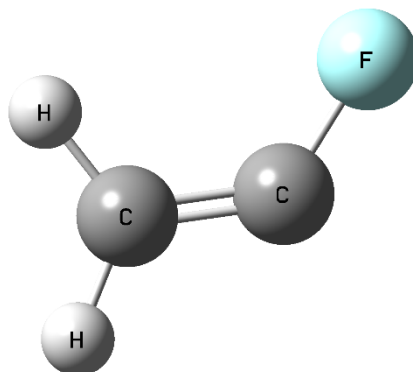

| Method                 | Ee          | E+ZPE       | ΔH          | ΔG                             |           |
|------------------------|-------------|-------------|-------------|--------------------------------|-----------|
| BMK/6-31G(d,p)         | -177.043089 | -177.011957 | -177.007633 | -177.036701                    |           |
| BMK/6-311++G(2df.2dp)  | -177.105282 | -177.074315 | -177.07     | -177.099036                    |           |
| M06/6-31G(d,p)         | -177.04264  | -177.011823 | -177.007474 | -177.036578                    |           |
| M06/6-311++G(2df.2dp)  | -177.104511 | -177.073879 | -177.069538 | -177.098606                    |           |
| M06-2X/DG3/aug-cc-pVTZ | -177.140062 | -177.108889 | -177.104583 | -177.133611                    |           |
| G4                     | -177.099745 | -177.069401 | -177.065044 | -177.094147                    |           |
| SVECV-f12              | -177.115925 | -177.084752 | -177.080446 | -177.109474                    |           |
| Coordinates (xyz)      |             |             |             | Vibrations (cm <sup>-1</sup> ) |           |
| C                      | 1.190173    | 0.117388    | 0.000000    | 438.9627                       | 1365.9202 |
| C                      | 0.002882    | -0.424264   | 0.000000    | 629.8457                       | 1729.8577 |
| H                      | 1.308563    | 1.197594    | 0.000001    | 828.9906                       | 3106.7193 |
| H                      | 2.070237    | -0.507390   | 0.000000    | 940.7917                       | 3236.4772 |
| F                      | -1.170793   | 0.127895    | 0.000000    | 1168.4226                      |           |

C. Pathway II.

| A1                     |              |           |           |                                |             |             |
|------------------------|--------------|-----------|-----------|--------------------------------|-------------|-------------|
|                        |              |           |           |                                |             |             |
| Method                 | Ee           |           |           | E+ZPE                          | $\Delta H$  | $\Delta G$  |
| BMK/6-31G(d,p)         | -677.0548953 |           |           | -676.980331                    | -676.973217 | -677.011488 |
| BMK/6-311++G(2df,2dp)  | -677.1594274 |           |           | -677.085351                    | -677.078226 | -677.116513 |
| M06/6-31G(d,p)         | -677.1619948 |           |           | -677.088538                    | -677.081356 | -677.119709 |
| M06/6-311++G(2df,2dp)  | -677.2616455 |           |           | -677.1886                      | -677.181433 | -677.219732 |
| M06-2X/DG3/aug-cc-pVTZ | -677.319223  |           |           | -677.245051                    | -677.237923 | -677.276168 |
| G4                     | -677.151909  |           |           | -677.079786                    | -677.072432 | -677.111205 |
| SVECV-f12              | -677.1964616 |           |           | -677.12229                     | -677.115162 | -677.153407 |
| Coordinates (xyz)      |              |           |           | Vibrations (cm <sup>-1</sup> ) |             |             |
| C                      | 1.568272     | 1.147723  | -0.108242 | 89.4908                        | 1006.7392   | 3069.803    |
| C                      | 0.941821     | -0.119127 | 0.288692  | 137.7101                       | 1110.5204   | 3087.1751   |
| C                      | -0.352738    | -0.247930 | 0.911623  | 163.3881                       | 1204.7672   | 3124.4628   |
| H                      | 1.282151     | 1.945019  | 0.577311  | 364.3307                       | 1323.8181   | 3164.086    |
| H                      | 2.656435     | 1.062959  | -0.124236 | 413.1823                       | 1340.0628   |             |
| H                      | 1.244628     | 1.439992  | -1.116131 | 494.4081                       | 1403.491    |             |
| F                      | 1.340732     | -1.183020 | -0.412435 | 553.9706                       | 1432.5529   |             |
| H                      | -0.556595    | -1.261279 | 1.247263  | 813.9491                       | 1439.4093   |             |
| H                      | -0.493586    | 0.468489  | 1.716372  | 886.9692                       | 1467.8873   |             |
| Cl                     | -1.714338    | 0.135765  | -0.302418 | 986.2857                       | 2984.911    |             |

**A1O2**

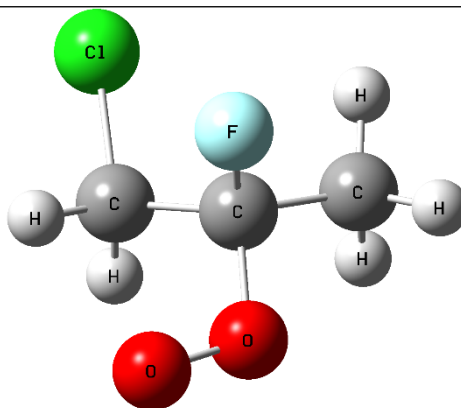

| Method                 | Ee           | E+ZPE       | $\Delta H$  | $\Delta G$                     |           |           |
|------------------------|--------------|-------------|-------------|--------------------------------|-----------|-----------|
| BMK/6-31G(d,p)         | -827.3678562 | -827.283761 | -827.275173 | -827.317035                    |           |           |
| BMK/6-311++G(2df.2dp)  | -827.519983  | -827.436515 | -827.427902 | -827.469832                    |           |           |
| M06/6-31G(d,p)         | -827.4698813 | -827.386915 | -827.37836  | -827.420014                    |           |           |
| M06/6-311++G(2df.2dp)  | -827.6169345 | -827.534454 | -827.52588  | -827.5676                      |           |           |
| M06-2X/DG3/aug-cc-pVTZ | -827.701997  | -827.61821  | -827.609701 | -827.651432                    |           |           |
| G4                     | -827.496749  | -827.415536 | -827.406779 | -827.448988                    |           |           |
| SVECV-f12              | -827.5597829 | -827.475996 | -827.467487 | -827.509218                    |           |           |
| Coordinates (xyz)      |              |             |             | Vibrations (cm <sup>-1</sup> ) |           |           |
| C                      | 0.244433     | 1.741995    | -0.455130   | 90.8132                        | 869.7763  | 1457.8132 |
| C                      | 0.459156     | 0.347823    | 0.039215    | 130.3886                       | 902.1385  | 3048.8996 |
| H                      | -0.706473    | 2.117508    | -0.082538   | 191.5256                       | 982.7767  | 3076.5906 |
| H                      | 1.050632     | 2.378752    | -0.092888   | 209.2852                       | 1101.6302 | 3137.8353 |
| H                      | 0.234431     | 1.759656    | -1.544889   | 269.9688                       | 1126.0189 | 3149.9786 |
| F                      | 0.503183     | 0.324562    | 1.386731    | 337.3588                       | 1244.9494 | 3151.0633 |
| O                      | 1.785574     | -0.015248   | -0.441928   | 389.5958                       | 1251.8922 |           |
| O                      | 2.146150     | -1.204000   | -0.058665   | 409.5301                       | 1302.8415 |           |
| C                      | -0.506541    | -0.701854   | -0.456765   | 506.4276                       | 1323.8347 |           |
| Cl                     | -2.179021    | -0.313213   | 0.002505    | 640.3173                       | 1413.2157 |           |
| H                      | -0.454186    | -0.763307   | -1.542841   | 768.2531                       | 1435.9425 |           |
| H                      | -0.245776    | -1.662853   | -0.019167   | 828.9503                       | 1455.071  |           |

**A10**

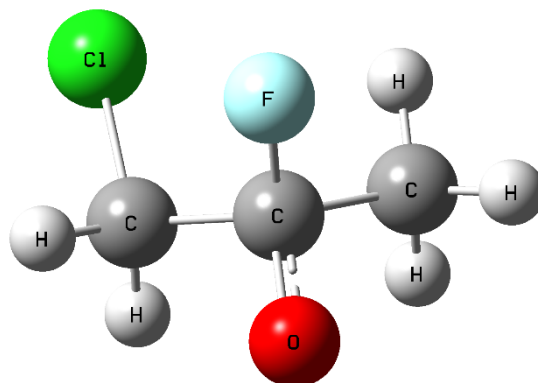

| Method                 | Ee           | E+ZPE       | $\Delta H$  | $\Delta G$                     |           |           |
|------------------------|--------------|-------------|-------------|--------------------------------|-----------|-----------|
| BMK/6-31G(d,p)         | -752.2456923 | -752.16646  | -752.158929 | -752.198008                    |           |           |
| BMK/6-311++G(2df.2dp)  | -752.3735498 | -752.295085 | -752.287476 | -752.326739                    |           |           |
| M06/6-31G(d,p)         | -752.348761  | -752.270865 | -752.263312 | -752.302326                    |           |           |
| M06/6-311++G(2df.2dp)  | -752.4721357 | -752.394918 | -752.387317 | -752.426434                    |           |           |
| M06-2X/DG3/aug-cc-pVTZ | -752.541888  | -752.463191 | -752.455627 | -752.494747                    |           |           |
| G4                     | -752.356466  | -752.280106 | -752.272321 | -752.3119                      |           |           |
| SVECV-f12              | -752.4097354 | -752.331038 | -752.323474 | -752.362594                    |           |           |
| Coordinates (xyz)      |              |             |             | Vibrations (cm <sup>-1</sup> ) |           |           |
| C                      | 0.995962     | 1.390876    | -0.329702   | 102.891                        | 914.2029  | 3045.5781 |
| C                      | 0.845812     | -0.099812   | -0.005267   | 205.7634                       | 965.7773  | 3080.7069 |
| H                      | 0.187744     | 1.919664    | 0.174456    | 222.0046                       | 1018.967  | 3147.7631 |
| H                      | 1.955900     | 1.736935    | 0.047373    | 278.5121                       | 1088.6175 | 3156.0563 |
| H                      | 0.940526     | 1.546661    | -1.405017   | 322.4081                       | 1166.483  | 3158.8864 |
| F                      | 0.793656     | -0.225774   | 1.366423    | 428.2487                       | 1227.1951 |           |
| O                      | 1.848156     | -0.755384   | -0.533362   | 466.4936                       | 1263.7688 |           |
| C                      | -0.455669    | -0.707839   | -0.580253   | 577.2868                       | 1357.6879 |           |
| Cl                     | -1.905395    | 0.102497    | 0.035112    | 737.1998                       | 1421.6268 |           |
| H                      | -0.435274    | -0.614961   | -1.66311    | 796.738                        | 1434.4902 |           |
| H                      | -0.501963    | -1.755055   | -0.290189   | 859.0831                       | 1450.4326 |           |

**CH<sub>2</sub>Cl**

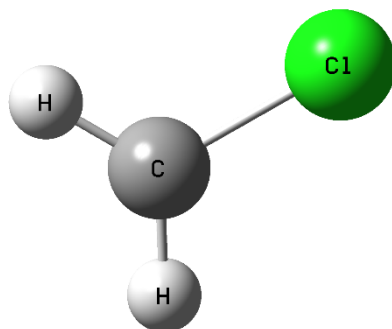

| Method                 | Ee           | E+ZPE       | ΔH                             | ΔG          |           |
|------------------------|--------------|-------------|--------------------------------|-------------|-----------|
| BMK/6-31G(d,p)         | -499.2635229 | -499.240968 | -499.23709                     | -499.264858 |           |
| BMK/6-311++G(2df.2dp)  | -499.3115905 | -499.288822 | -499.284398                    | -499.313108 |           |
| M06/6-31G(d,p)         | -499.3705547 | -499.348312 | -499.344426                    | -499.372174 |           |
| M06/6-311++G(2df.2dp)  | -499.4143551 | -499.391836 | -499.387392                    | -499.416126 |           |
| M06-2X/DG3/aug-cc-pVTZ | -499.43853   | -499.415799 | -499.411278                    | -499.440256 |           |
| G4                     | -499.310928  | -499.289052 | -499.285154                    | -499.312918 |           |
| SVECV-f12              | -499.3387019 | -499.315971 | -499.31145                     | -499.340428 |           |
| Coordinates (xyz)      |              |             | Vibrations (cm <sup>-1</sup> ) |             |           |
| C                      | 0.000000     | 0.000000    | -1.110923                      | 222.5605    | 3134.1263 |
| Cl                     | 0.000000     | 0.000000    | 0.582254                       | 855.0293    | 3289.8838 |
| H                      | 0.000000     | 0.951820    | -1.616391                      | 977.2457    |           |
| H                      | 0.000000     | -0.951820   | -1.616391                      | 1375.1168   |           |

**CH<sub>2</sub>ClO<sub>2</sub>**

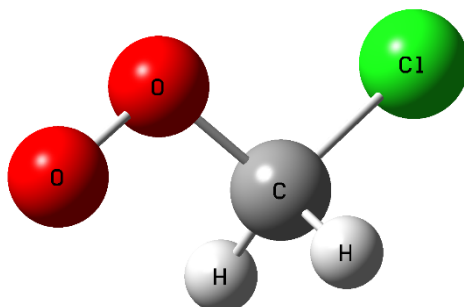

| Method                 | Ee           | E+ZPE       | ΔH          | ΔG                             |           |
|------------------------|--------------|-------------|-------------|--------------------------------|-----------|
| BMK/6-31G(d,p)         | -649.571217  | -649.53618  | -649.530704 | -649.565117                    |           |
| BMK/6-311++G(2df.2dp)  | -649.66885   | -649.633985 | -649.628529 | -649.662732                    |           |
| M06/6-31G(d,p)         | -649.672316  | -649.63805  | -649.632575 | -649.66677                     |           |
| M06/6-311++G(2df.2dp)  | -649.72012   | -649.72465  | -649.719175 | -649.753347                    |           |
| M06-2X/DG3/aug-cc-pVTZ | -649.816885  | -649.781617 | -649.776371 | -649.81003                     |           |
| G4                     | -649.646051  | -649.612114 | -649.606747 | -649.64072                     |           |
| SVECV-f12              | -649.6944036 | -649.659136 | -649.65389  | -649.687549                    |           |
| Coordinates (xyz)      |              |             |             | Vibrations (cm <sup>-1</sup> ) |           |
| Cl                     | -1.549829    | -0.119807   | 0.000055    | 70.5985                        | 1184.9226 |
| C                      | 0.053522     | 0.590363    | 0.000036    | 286.2522                       | 1248.1873 |
| H                      | 0.199063     | 1.182931    | -0.900873   | 449.624                        | 1316.4818 |
| H                      | 0.199082     | 1.182911    | 0.900955    | 828.8656                       | 1437.2063 |
| O                      | 1.002079     | -0.490400   | 0.000011    | 943.8496                       | 3060.741  |
| O                      | 2.201398     | 0.006487    | -0.000165   | 983.578                        | 3145.2623 |

**CH<sub>2</sub>ClO**

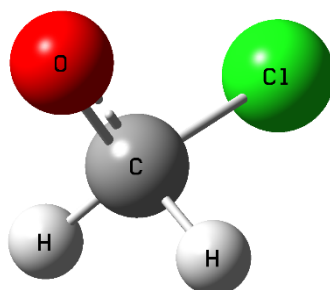

| Method                 | Ee           | E+ZPE       | ΔH          | ΔG                             |           |
|------------------------|--------------|-------------|-------------|--------------------------------|-----------|
| BMK/6-31G(d,p)         | -574.452432  | -574.423384 | -574.419019 | -574.449633                    |           |
| BMK/6-311++G(2df.2dp)  | -574.524811  | -574.496179 | -574.49179  | -574.522423                    |           |
| M06/6-31G(d,p)         | -574.556838  | -574.528685 | -574.524262 | -574.554948                    |           |
| M06/6-311++G(2df.2dp)  | -574.625378  | -574.597641 | -574.593205 | -574.62389                     |           |
| M06-2X/DG3/aug-cc-pVTZ | -574.65812   | -574.629371 | -574.624979 | -574.655611                    |           |
| G4                     | -574.505902  | -574.478264 | -574.478264 | -574.473792                    |           |
| SVECV-f12              | -574.5446651 | -574.515916 | -574.511524 | -574.542156                    |           |
| Coordinates (xyz)      |              |             |             | Vibrations (cm <sup>-1</sup> ) |           |
| Cl                     | 0.548480     | -0.929223   | 0.000000    | 398.4346                       | 1205.5535 |
| C                      | 0.000000     | 0.820894    | 0.000000    | 622.9231                       | 1277.9176 |
| H                      | 0.478073     | 1.283334    | 0.886673    | 683.9125                       | 2880.7437 |
| H                      | 0.478073     | 1.283334    | -0.886673   | 1023.4573                      | 2916.3703 |
| O                      | -1.285039    | 1.038095    | 0.000000    | 1165.7086                      |           |

D. Pathway III.

| TSA2                                                                               |             |           |           |                                |             |             |
|------------------------------------------------------------------------------------|-------------|-----------|-----------|--------------------------------|-------------|-------------|
| 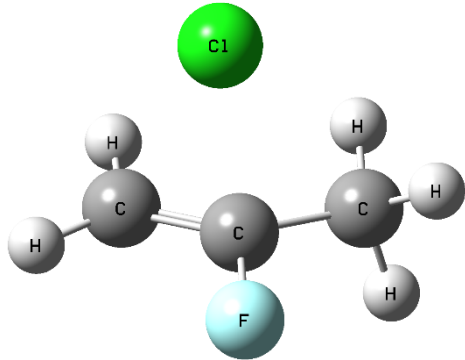 |             |           |           |                                |             |             |
| Method                                                                             | Ee          |           |           | E+ZPE                          | $\Delta H$  | $\Delta G$  |
| BMK/6-31G(d,p)                                                                     | -677.036039 |           |           | -676.963138                    | -676.956446 | -676.993222 |
| BMK/6-311++G(2df,2dp)                                                              | -677.140622 |           |           | -677.067981                    | -677.061336 | -677.098002 |
| M06/6-31G(d,p)                                                                     | -677.146842 |           |           | -677.074914                    | -677.068206 | -677.104952 |
| M06/6-311++G(2df,2dp)                                                              | -677.245649 |           |           | -677.173991                    | -677.167324 | -677.203976 |
| M06-2X/DG3/aug-cc-pVTZ                                                             | -677.302039 |           |           | -677.229336                    | -677.222683 | -677.259326 |
| G4                                                                                 | -677.135838 |           |           | -677.065014                    | -677.05824  | -677.095088 |
| SVECV-f12                                                                          | -677.178835 |           |           | -677.106132                    | -677.099479 | -677.136122 |
| Coordinates (xyz)                                                                  |             |           |           | Vibrations (cm <sup>-1</sup> ) |             |             |
| C                                                                                  | -1.174754   | 1.234325  | 0.379118  | <i>i</i> 255.3279              | 986.4132    | 3131.8753   |
| C                                                                                  | -0.713010   | -0.150170 | 0.059800  | 185.411                        | 1033.002    | 3171.0928   |
| C                                                                                  | -0.411086   | -1.141597 | 0.965488  | 223.1866                       | 1056.0032   | 3181.1872   |
| H                                                                                  | -0.790670   | 1.548362  | 1.346906  | 266.585                        | 1349.3644   | 3298.0123   |
| H                                                                                  | -0.834187   | 1.923499  | -0.391717 | 374.2842                       | 1398.4697   |             |
| H                                                                                  | -2.268870   | 1.236779  | 0.398910  | 399.3998                       | 1441.3926   |             |
| F                                                                                  | -1.000296   | -0.522670 | -1.172469 | 485.3556                       | 1482.8926   |             |
| H                                                                                  | -0.256810   | -2.155061 | 0.623817  | 626.799                        | 1496.3957   |             |
| H                                                                                  | -0.240694   | -0.884673 | 1.999494  | 834.1644                       | 1557.0791   |             |
| Cl                                                                                 | 1.599235    | 0.19881   | -0.108919 | 860.7229                       | 3046.651    |             |



**A2**

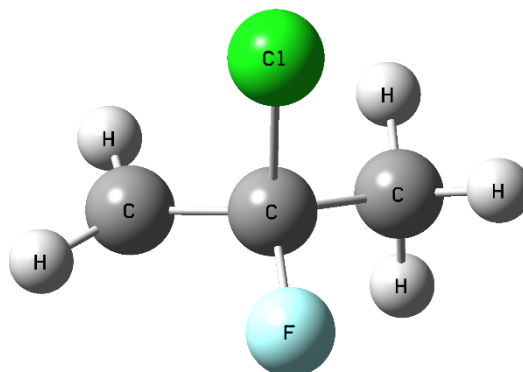

| Method                 | Ee          | E+ZPE       | $\Delta H$  | $\Delta G$                     |           |           |
|------------------------|-------------|-------------|-------------|--------------------------------|-----------|-----------|
| BMK/6-31G(d,p)         | -677.048253 | -676.975197 | -676.968329 | -677.004979                    |           |           |
| BMK/6-311++G(2df.2dp)  | -677.153222 | -677.080659 | -677.073789 | -677.110425                    |           |           |
| M06/6-31G(d,p)         | -677.156293 | -677.084678 | -677.077534 | -677.114758                    |           |           |
| M06/6-311++G(2df.2dp)  | -677.256152 | -677.184944 | -677.17777  | -677.215078                    |           |           |
| M06-2X/DG3/aug-cc-pVTZ | -677.314508 | -677.242295 | -677.235249 | -677.272232                    |           |           |
| G4                     | -677.14964  | -677.079176 | -677.071962 | -677.109268                    |           |           |
| SVECV-f12              | -677.193156 | -677.120943 | -677.113897 | -677.15088                     |           |           |
| Coordinates (xyz)      |             |             |             | Vibrations (cm <sup>-1</sup> ) |           |           |
| C                      | 0.990834    | 1.253704    | -0.430433   | 256.9448                       | 926.772   | 3145.6993 |
| C                      | 0.421179    | -0.065980   | 0.012192    | 267.2406                       | 994.0457  | 3157.9799 |
| C                      | 0.769716    | -1.227609   | -0.801357   | 277.2973                       | 1064.2954 | 3166.6266 |
| H                      | 0.703651    | 1.470074    | -1.462489   | 312.1792                       | 1272.3782 | 3281.1294 |
| H                      | 0.625703    | 2.052774    | 0.219462    | 375.7652                       | 1296.2597 |           |
| H                      | 2.083284    | 1.206437    | -0.363308   | 396.0372                       | 1401.9543 |           |
| F                      | 0.732724    | -0.284322   | 1.313825    | 466.202                        | 1422.0847 |           |
| H                      | 0.733880    | -2.211770   | -0.347050   | 546.1041                       | 1455.6921 |           |
| H                      | 0.800361    | -1.131211   | -1.881238   | 600.5087                       | 1462.684  |           |
| Cl                     | -1.448928   | 0.083054    | -0.039542   | 861.1525                       | 3049.6971 |           |

**A2O<sub>2</sub>**

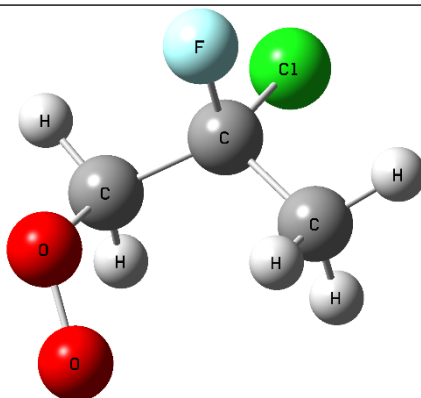

| Method                 | Ee          | E+ZPE       | ΔH          | ΔG                             |           |           |
|------------------------|-------------|-------------|-------------|--------------------------------|-----------|-----------|
| BMK/6-31G(d,p)         | -827.360959 | -827.276357 | -827.267909 | -827.309429                    |           |           |
| BMK/6-311++G(2df.2dp)  | -827.51474  | -827.430617 | -827.42218  | -827.463602                    |           |           |
| M06/6-31G(d,p)         | -827.463065 | -827.379944 | -827.371426 | -827.413022                    |           |           |
| M06/6-311++G(2df.2dp)  | -827.611656 | -827.529044 | -827.520495 | -827.562198                    |           |           |
| M06-2X/DG3/aug-cc-pVTZ | -827.694275 | -827.61021  | -827.601753 | -827.643306                    |           |           |
| G4                     | -827.48885  | -827.40749  | -827.398731 | -827.44103                     |           |           |
| SVECV-f12              | -827.551842 | -827.467777 | -827.45932  | -827.500873                    |           |           |
| Coordinates (xyz)      |             |             |             | Vibrations (cm <sup>-1</sup> ) |           |           |
| C                      | -0.085773   | 1.506119    | -0.514919   | 78.8813                        | 923.2559  | 1456.5122 |
| C                      | -0.384349   | 0.209178    | 0.170021    | 118.09                         | 968.4135  | 3042.8566 |
| H                      | -0.003739   | 1.360787    | -1.591010   | 213.3258                       | 1006.9859 | 3064.7138 |
| H                      | -0.885587   | 2.214989    | -0.305230   | 270.6783                       | 1093.3472 | 3131.2189 |
| H                      | 0.855937    | 1.907367    | -0.137853   | 295.0618                       | 1179.0638 | 3141.5298 |
| F                      | -0.485650   | 0.416986    | 1.504861    | 311.9353                       | 1240.0131 | 3144.6467 |
| Cl                     | -1.970437   | -0.440352   | -0.404004   | 384.8594                       | 1249.5531 |           |
| O                      | 1.918433    | -0.516172   | 0.375283    | 406.5223                       | 1307.5706 |           |
| O                      | 2.592217    | 0.060842    | -0.576543   | 486.1572                       | 1351.6838 |           |
| C                      | 0.60793     | -0.909171   | -0.064503   | 548.5051                       | 1404.5078 |           |
| H                      | 0.657156    | -1.174071   | -1.120163   | 721.1506                       | 1417.6557 |           |
| H                      | 0.332464    | -1.770081   | 0.545061    | 856.0974                       | 1447.7537 |           |

**A2O**

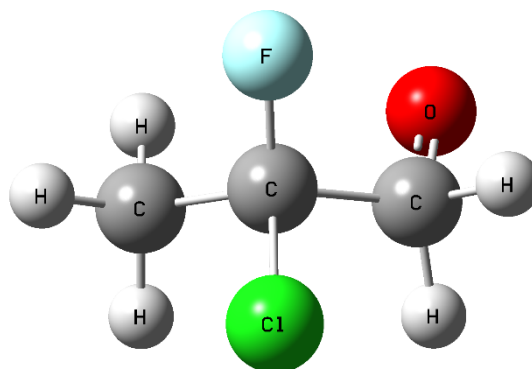

| Method                 | Ee          | E+ZPE       | $\Delta H$  | $\Delta G$                     |           |           |
|------------------------|-------------|-------------|-------------|--------------------------------|-----------|-----------|
| BMK/6-31G(d,p)         | -752.22676  | -752.146053 | -752.138619 | -752.17727                     |           |           |
| BMK/6-311++G(2df.2dp)  | -752.356191 | -752.27586  | -752.268404 | -752.307084                    |           |           |
| M06/6-31G(d,p)         | -752.337939 | -752.260908 | -752.253302 | -752.29222                     |           |           |
| M06/6-311++G(2df.2dp)  | -752.462294 | -752.385884 | -752.378257 | -752.417205                    |           |           |
| M06-2X/DG3/aug-cc-pVTZ | -752.525037 | -752.444993 | -752.437541 | -752.476263                    |           |           |
| G4                     | -752.344464 | -752.269256 | -752.261416 | -752.300909                    |           |           |
| SVECV-f12              | -752.392015 | -752.311971 | -752.304519 | -752.343241                    |           |           |
| Coordinates (xyz)      |             |             |             | Vibrations (cm <sup>-1</sup> ) |           |           |
| C                      | 0.151182    | 1.470418    | -0.735026   | 131.9151                       | 981.0867  | 2920.471  |
| C                      | -0.008201   | 0.225477    | 0.087130    | 217.9983                       | 1064.4421 | 2962.6092 |
| H                      | 0.003433    | 1.256802    | -1.797218   | 260.6473                       | 1098.743  | 3053.9309 |
| H                      | -0.572300   | 2.223964    | -0.414947   | 296.1121                       | 1118.2142 | 3152.8235 |
| H                      | 1.166145    | 1.851101    | -0.580427   | 344.28                         | 1259.856  | 3164.7862 |
| F                      | 0.123839    | 0.534431    | 1.401794    | 370.3609                       | 1286.0653 |           |
| Cl                     | -1.669298   | -0.480895   | -0.149461   | 414.6171                       | 1304.9513 |           |
| O                      | 2.279514    | -0.481352   | -0.143407   | 479.7996                       | 1374.652  |           |
| C                      | 0.991740    | -0.877198   | -0.237586   | 638.7338                       | 1403.8117 |           |
| H                      | 0.8057      | -1.282852   | -1.253916   | 731.7871                       | 1454.5176 |           |
| H                      | 0.816096    | -1.745043   | 0.431342    | 862.5736                       | 1463.0875 |           |

**H<sub>3</sub>C-CFCl**

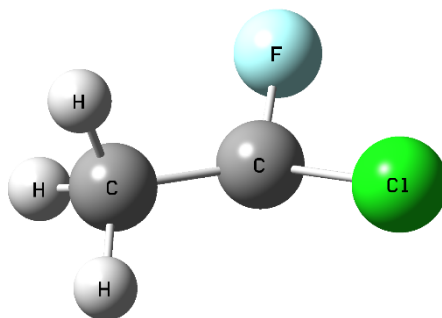

| Method                 | Ee          | E+ZPE       | ΔH          | ΔG                             |           |           |
|------------------------|-------------|-------------|-------------|--------------------------------|-----------|-----------|
| BMK/6-31G(d,p)         | -637.763518 | -637.717263 | -637.711693 | -637.745715                    |           |           |
| BMK/6-311++G(2df.2dp)  | -637.858792 | -637.812911 | -637.807326 | -637.841367                    |           |           |
| M06/6-31G(d,p)         | -637.871365 | -637.825884 | -637.820245 | -637.854372                    |           |           |
| M06/6-311++G(2df.2dp)  | -637.962206 | -637.917042 | -637.911388 | -637.945544                    |           |           |
| M06-2X/DG3/aug-cc-pVTZ | -638.011519 | -637.960983 | -637.955379 | -637.98944                     |           |           |
| G4                     | -637.843622 | -637.798934 | -637.793239 | -637.827489                    |           |           |
| SVECV-f12              | -637.889115 | -637.838579 | -637.832975 | -637.867036                    |           |           |
| Coordinates (xyz)      |             |             |             | Vibrations (cm <sup>-1</sup> ) |           |           |
| C                      | -1.336851   | -0.978619   | 0.044140    | 184.9251                       | 1149.9123 | 3136.8259 |
| H                      | -2.319327   | -0.726660   | -0.357142   | 316.596                        | 1268.5264 |           |
| H                      | -1.003686   | -1.918917   | -0.390938   | 378.2092                       | 1390.6079 |           |
| H                      | -1.435294   | -1.116228   | 1.128791    | 407.5455                       | 1435.5258 |           |
| C                      | -0.381506   | 0.096645    | -0.273278   | 661.3182                       | 1446.1235 |           |
| F                      | -0.773409   | 1.319531    | 0.062302    | 956.7893                       | 2984.6496 |           |
| Cl                     | 1.295831    | -0.166008   | 0.025494    | 1023.5547                      | 3083.2054 |           |

**H<sub>3</sub>C-CFCIO<sub>2</sub>**

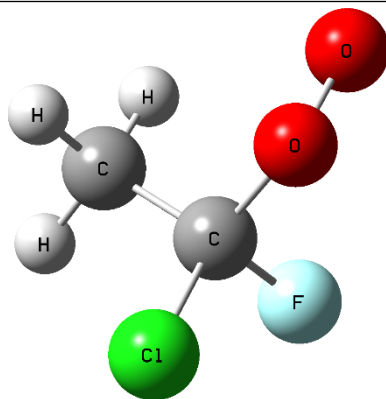

| Method                 | Ee          | E+ZPE       | ΔH          | ΔG                             |           |           |
|------------------------|-------------|-------------|-------------|--------------------------------|-----------|-----------|
| BMK/6-31G(d,p)         | -788.076214 | -788.021021 | -788.013871 | -788.05203                     |           |           |
| BMK/6-311++G(2df.2dp)  | -788.218828 | -788.164074 | -788.156896 | -788.195115                    |           |           |
| M06/6-31G(d,p)         | -788.181189 | -788.126919 | -788.119701 | -788.157953                    |           |           |
| M06/6-311++G(2df.2dp)  | -788.318546 | -788.264705 | -788.257458 | -788.295776                    |           |           |
| M06-2X/DG3/aug-cc-pVTZ | -788.38818  | -788.33346  | -788.326261 | -788.364517                    |           |           |
| G4                     | -788.184636 | -788.131723 | -788.124318 | -788.162999                    |           |           |
| SVECV-f12              | -788.249725 | -788.195005 | -788.187806 | -788.226062                    |           |           |
| Coordinates (xyz)      |             |             |             | Vibrations (cm <sup>-1</sup> ) |           |           |
| C                      | -0.283585   | 1.471749    | -0.629146   | 119.1182                       | 818.5657  | 3052.3585 |
| H                      | 0.398506    | 2.24546     | -0.281914   | 241.032                        | 969.1685  | 3147.9317 |
| H                      | -0.143493   | 1.316593    | -1.696992   | 254.2575                       | 1104.1852 | 3153.3285 |
| H                      | -1.311519   | 1.771931    | -0.429103   | 312.2158                       | 1163.9411 |           |
| C                      | 0.001814    | 0.208881    | 0.110261    | 377.9079                       | 1232.9511 |           |
| F                      | -0.19556    | 0.355936    | 1.417818    | 406.467                        | 1239.317  |           |
| Cl                     | 1.640048    | -0.397445   | -0.174374   | 467.2879                       | 1395.2277 |           |
| O                      | -0.831658   | -0.891034   | -0.332055   | 530.6361                       | 1444.8627 |           |
| O                      | -2.090048   | -0.592044   | -0.202281   | 751.6904                       | 1450.8265 |           |

**H<sub>3</sub>C-CFCIO**

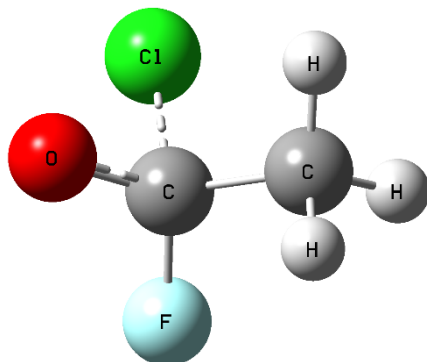

| Method                 | Ee          | E+ZPE       | $\Delta H$  | $\Delta G$                     |           |           |
|------------------------|-------------|-------------|-------------|--------------------------------|-----------|-----------|
| BMK/6-31G(d,p)         | -712.955546 | -712.905503 | -712.899043 | -712.93532                     |           |           |
| BMK/6-311++G(2df.2dp)  | -713.073712 | -713.023991 | -713.017558 | -713.053686                    |           |           |
| M06/6-31G(d,p)         | -713.062728 | -713.013274 | -713.00683  | -713.042893                    |           |           |
| M06/6-311++G(2df.2dp)  | -713.176287 | -713.127213 | -713.120762 | -713.156817                    |           |           |
| M06-2X/DG3/aug-cc-pVTZ | -713.229757 | -713.180083 | -713.173647 | -713.209783                    |           |           |
| G4                     | -713.044156 | -712.996029 | -712.989256 | -713.026062                    |           |           |
| SVECV-f12              | -713.100658 | -713.050984 | -713.044548 | -713.080684                    |           |           |
| Coordinates (xyz)      |             |             |             | Vibrations (cm <sup>-1</sup> ) |           |           |
| C                      | 1.20231     | 1.158641    | -0.069957   | 239.7172                       | 980.5511  | 3136.0079 |
| H                      | 1.075777    | 1.533231    | -1.08411    | 247.1449                       | 1020.496  | 3162.4671 |
| H                      | 0.854751    | 1.893279    | 0.65162     | 271.3807                       | 1186.2501 |           |
| H                      | 2.257455    | 0.943212    | 0.103329    | 375.9164                       | 1282.0135 |           |
| C                      | 0.429252    | -0.117255   | 0.091854    | 422.3967                       | 1378.3233 |           |
| F                      | 0.777675    | -0.991305   | -0.872618   | 482.4201                       | 1443.0966 |           |
| Cl                     | -1.402528   | 0.197339    | -0.129173   | 570.9289                       | 1448.1101 |           |
| O                      | 0.358317    | -0.631382   | 1.280911    | 848.7021                       | 3045.3694 |           |

E. Products.

| P1_H <sub>2</sub> C=O                                                             |                |           |                                |             |             |
|-----------------------------------------------------------------------------------|----------------|-----------|--------------------------------|-------------|-------------|
| 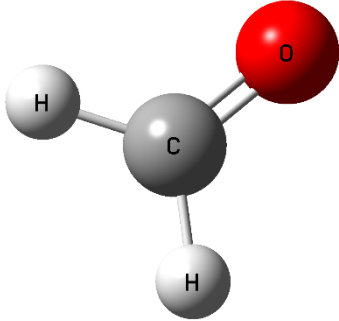 |                |           |                                |             |             |
| Method                                                                            | E <sub>e</sub> |           | E+ZPE                          | ΔH          | ΔG          |
| BMK/6-31G(d,p)                                                                    | -114.441354    |           | -114.41422                     | -114.410411 | -114.435224 |
| BMK/6-311++G(2df.2dp)                                                             | -114.481024    |           | -114.454004                    | -114.450195 | -114.474994 |
| M06/6-31G(d,p)                                                                    | -114.437406    |           | -114.410787                    | -114.406975 | -114.43179  |
| M06/6-311++G(2df.2dp)                                                             | -114.478223    |           | -114.451814                    | -114.448002 | -114.472803 |
| M06-2X/DG3/aug-cc-pVTZ                                                            | -114.498971    |           | -114.471958                    | -114.468148 | -114.492949 |
| G4                                                                                | -114.479393    |           | -114.453181                    | -114.449367 | -114.474181 |
| SVECV-f12                                                                         | -114.487282    |           | -114.460269                    | -114.456459 | -114.48126  |
| Coordinates (xyz)                                                                 |                |           | Vibrations (cm <sup>-1</sup> ) |             |             |
| C                                                                                 | 0.000000       | 0.519713  | 0.000000                       | 1206.7935   | 2844.3568   |
| H                                                                                 | 0.935624       | 1.119788  | 0.000000                       | 1258.3967   | 2896.738    |
| O                                                                                 | 0.000000       | -0.669732 | 0.000000                       | 1516.5624   |             |
| H                                                                                 | -0.935630      | 1.119789  | 0.000000                       | 1882.8041   |             |

P2\_C<sub>4</sub>H<sub>4</sub>F<sub>2</sub>

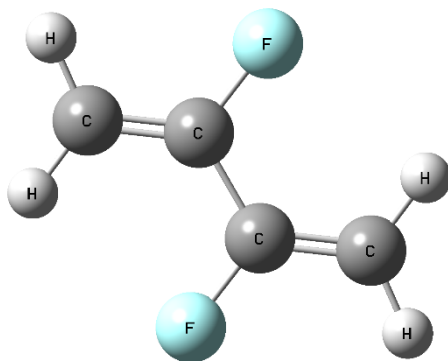

| Method                 | Ee          | E+ZPE       | ΔH          | ΔG                             |           |           |
|------------------------|-------------|-------------|-------------|--------------------------------|-----------|-----------|
| BMK/6-31G(d,p)         | -354.285654 | -354.214924 | -354.208289 | -354.243618                    |           |           |
| BMK/6-311++G(2df.2dp)  | -354.402983 | -354.33335  | -354.32667  | -354.362057                    |           |           |
| M06/6-31G(d,p)         | -354.284512 | -354.214378 | -354.207714 | -354.243054                    |           |           |
| M06/6-311++G(2df.2dp)  | -354.406208 | -354.335772 | -354.329152 | -354.364457                    |           |           |
| M06-2X/DG3/aug-cc-pVTZ | -354.475155 | -354.404636 | -354.39797  | -354.434015                    |           |           |
| G4                     | -354.394621 | -354.325749 | -354.318993 | -354.355185                    |           |           |
| SVECV-f12              | -354.429722 | -354.359203 | -354.352537 | -354.388582                    |           |           |
| Coordinates (xyz)      |             |             |             | Vibrations (cm <sup>-1</sup> ) |           |           |
| C                      | -0.310985   | 1.822613    | 0           | 104.4326                       | 895.707   | 3169.519  |
| H                      | 0.252796    | 2.743929    | 0           | 261.2858                       | 898.6248  | 3169.8934 |
| H                      | -1.388813   | 1.857077    | 0           | 372.955                        | 953.7757  | 3275.6295 |
| C                      | 0.310985    | 0.657465    | 0           | 389.8444                       | 958.5811  | 3275.8279 |
| C                      | -0.310985   | -0.657465   | 0           | 507.5537                       | 1206.1969 |           |
| C                      | 0.310985    | -1.822613   | 0           | 513.8962                       | 1364.9576 |           |
| H                      | -0.252796   | -2.743929   | 0           | 717.1233                       | 1378.0575 |           |
| H                      | 1.388813    | -1.857077   | 0           | 727.0667                       | 1417.8005 |           |
| F                      | 1.64302     | 0.596033    | 0           | 762.3581                       | 1697.6076 |           |
| F                      | -1.64302    | -0.596033   | 0           | 796.1905                       | 1750.3238 |           |



P3\_CH<sub>3</sub>C(=O)F

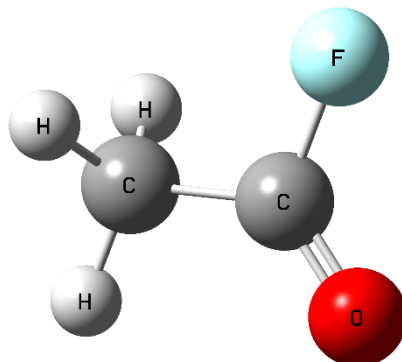

| Method                 | Ee          | E+ZPE       | ΔH          | ΔG                             |           |           |
|------------------------|-------------|-------------|-------------|--------------------------------|-----------|-----------|
| BMK/6-31G(d,p)         | -252.978607 | -252.928829 | -252.923601 | -252.955577                    |           |           |
| BMK/6-311++G(2df.2dp)  | -253.064578 | -253.015111 | -253.009887 | -253.041854                    |           |           |
| M06/6-31G(d,p)         | -252.976402 | -252.927196 | -252.921974 | -252.953881                    |           |           |
| M06/6-311++G(2df.2dp)  | -253.063042 | -253.014135 | -253.008913 | -253.040827                    |           |           |
| M06-2X/DG3/aug-cc-pVTZ | -253.101715 | -253.052503 | -253.047969 | -253.07851                     |           |           |
| G4                     | -253.045629 | -252.997631 | -252.99305  | -253.023673                    |           |           |
| SVECV-f12              | -253.072712 | -253.0235   | -253.018966 | -253.049507                    |           |           |
| Coordinates (xyz)      |             |             |             | Vibrations (cm <sup>-1</sup> ) |           |           |
| C                      | 0.128792    | -0.135281   | -0.000002   | 136.651                        | 1213.1476 | 3167.7564 |
| F                      | 0.64598     | 1.107025    | 0.000007    | 419.6449                       | 1388.0378 |           |
| O                      | 0.836592    | -1.075308   | -0.000007   | 578.885                        | 1441.0953 |           |
| C                      | -1.35329    | -0.072204   | 0           | 612.5613                       | 1448.2692 |           |
| H                      | -1.694198   | 0.479156    | 0.87663     | 868.8967                       | 1953.0842 |           |
| H                      | -1.6942     | 0.479185    | -0.87661    | 1004.3129                      | 3048.9809 |           |
| H                      | -1.771173   | -1.074198   | -0.000015   | 1061.2759                      | 3125.2085 |           |

**P4\_CH(=O)Cl**

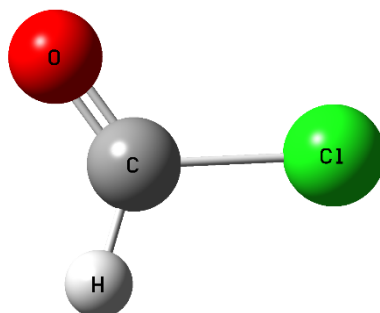

| Method                 | Ee          | E+ZPE       | $\Delta H$  | $\Delta G$                     |           |
|------------------------|-------------|-------------|-------------|--------------------------------|-----------|
| BMK/6-31G(d,p)         | -573.921007 | -573.90133  | -573.897173 | -573.926541                    |           |
| BMK/6-311++G(2df.2dp)  | -573.995087 | -573.975589 | -573.971426 | -574.000786                    |           |
| M06/6-31G(d,p)         | -574.026534 | -574.007291 | -574.003107 | -574.032504                    |           |
| M06/6-311++G(2df.2dp)  | -574.097108 | -574.078017 | -574.073836 | -574.10321                     |           |
| M06-2X/DG3/aug-cc-pVTZ | -574.131838 | -574.109206 | -574.105036 | -574.134393                    |           |
| G4                     | -573.976899 | -573.958066 | -573.95385  | -573.983302                    |           |
| SVECV-f12              | -574.016748 | -573.994116 | -573.989946 | -574.019303                    |           |
| Coordinates (xyz)      |             |             |             | Vibrations (cm <sup>-1</sup> ) |           |
| C                      | 0           | 0.797747    | 0           | 463.6657                       | 1896.6745 |
| H                      | -0.903955   | 1.422673    | 0           | 742.2709                       | 3011.6959 |
| Cl                     | -0.470786   | -0.913071   | 0           | 958.6175                       |           |
| O                      | 1.113415    | 1.164131    | 0           | 1306.7403                      |           |

## HCl

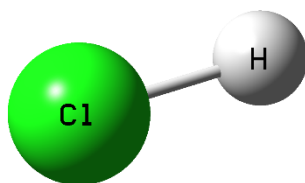

| Method                 | Ee          | E+ZPE       | $\Delta H$                     | $\Delta G$  |
|------------------------|-------------|-------------|--------------------------------|-------------|
| BMK/6-31G(d,p)         | -460.652146 | -460.645236 | -460.641931                    | -460.663144 |
| BMK/6-311++G(2df.2dp)  | -460.691111 | -460.684343 | -460.681038                    | -460.702238 |
| M06/6-31G(d,p)         | -460.763827 | -460.757068 | -460.753764                    | -460.774953 |
| M06/6-311++G(2df.2dp)  | -460.797364 | -460.790599 | -460.787295                    | -460.808479 |
| M06-2X/DG3/aug-cc-pVTZ | -460.807507 | -460.800702 | -460.797398                    | -460.81858  |
| G4                     | -460.685342 | -460.678701 | -460.675396                    | -460.696585 |
| SVECV-f12              | -460.714454 | -460.707649 | -460.704344                    | -460.725527 |
| Coordinates (xyz)      |             |             | Vibrations (cm <sup>-1</sup> ) |             |
| H                      | 0           | 0           | -1.209193                      | 2969.1491   |
| Cl                     | 0           | 0           | 0.071129                       |             |

**H<sub>2</sub>O<sub>2</sub>**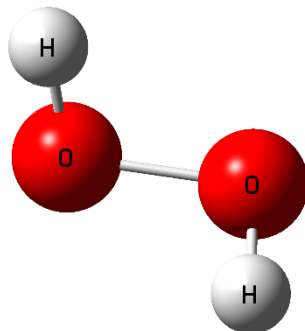

| Method                 | Ee          | E+ZPE       | $\Delta H$                     | $\Delta G$  |           |
|------------------------|-------------|-------------|--------------------------------|-------------|-----------|
| BMK/6-31G(d,p)         | -151.47345  | -151.446056 | -151.441882                    | -151.468345 |           |
| BMK/6-311++G(2df.2dp)  | -151.532943 | -151.505526 | -151.501379                    | -151.527774 |           |
| M06/6-31G(d,p)         | -151.473675 | -151.446634 | -151.442482                    | -151.468897 |           |
| M06/6-311++G(2df.2dp)  | -151.533273 | -151.506185 | -151.502059                    | -151.528412 |           |
| M06-2X/DG3/aug-cc-pVTZ | -151.553652 | -151.526513 | -151.522355                    | -151.548117 |           |
| G4                     | -151.520696 | -151.494549 | -151.490368                    | -151.516197 |           |
| SVECV-f12              | -151.539996 | -151.539996 | -151.537636                    | -151.554948 |           |
| Coordinates (xyz)      |             |             | Vibrations (cm <sup>-1</sup> ) |             |           |
| O                      | -1.47058819 | -2.18009994 | 0.00043871                     | 410.227     | 3827.2693 |
| H                      | -1.79082077 | -1.27508595 | -0.00043846                    | 1018.5736   | 3829.139  |
| O                      | -0.15058824 | -2.17976074 | 0.00043865                     | 1347.2608   |           |
| H                      | 0.16964434  | -3.08477473 | 0.00131582                     | 1457.9789   |           |

## II. Summary of energies of the three reaction paths, energies (kcal/mol)

### A. Energies for the final products.

| ROUTE | REACTANTS                   | PRODUCTS                                    | ENERGY   | BMK        |                   | M06        |                   | M062X/GD3   | G4     | SVEVC-f12 |
|-------|-----------------------------|---------------------------------------------|----------|------------|-------------------|------------|-------------------|-------------|--------|-----------|
|       |                             |                                             |          | 6-31G(d,p) | 6-311++G(2df,2pd) | 6-31G(d,p) | 6-311++G(2df,2pd) | aug-cc-pVTZ |        |           |
| I     | 2FP + 2Cl + O <sub>2</sub>  | → 2P1 + P2 + 2HCl                           | ΔE       | -60.7      | -66.8             | -58.9      | -62.7             | -61.0       | -62.9  | -63.6     |
|       |                             |                                             | Δ(E+ZPE) | -64.3      | -70.1             | -62.4      | -66.5             | -64.5       | -66.4  | -65.8     |
|       |                             |                                             | ΔH       | -63.7      | -69.5             | -61.8      | -65.9             | -63.9       | -65.8  | -64.9     |
|       |                             |                                             | ΔG       | -64.9      | -70.7             | -63.0      | -67.1             | -65.3       | -67.2  | -68.0     |
| II    | 2FP + 2Cl + 3O <sub>2</sub> | → 2P3 + 2P4 + H <sub>2</sub> O <sub>2</sub> | ΔE       | -153.6     | -160.2            | -151.4     | -155.9            | -149.8      | -149.7 | -151.0    |
|       |                             |                                             | Δ(E+ZPE) | -151.2     | -157.7            | -148.8     | -153.3            | -145.6      | -147.7 | -151.6    |
|       |                             |                                             | ΔH       | -152.0     | -158.5            | -149.6     | -154.2            | -146.9      | -148.9 | -152.5    |
|       |                             |                                             | ΔG       | -145.4     | -151.9            | -143.0     | -147.6            | -139.2      | -141.3 | -147.1    |
| III   | FP + O <sub>2</sub>         | → P1 + P3                                   | ΔE       | -89.8      | -92.4             | -89.0      | -89.9             | -83.2       | -86.0  | -85.6     |
|       |                             |                                             | Δ(E+ZPE) | -89.9      | -92.6             | -89.0      | -90.0             | -83.5       | -86.3  | -83.4     |
|       |                             |                                             | ΔH       | -89.8      | -92.4             | -88.8      | -89.8             | -83.8       | -86.6  | -83.1     |
|       |                             |                                             | ΔG       | -90.6      | -93.3             | -89.7      | -90.7             | -83.8       | -86.6  | -86.3     |

**B.** Energies for the products of the first dimerization.

| ROUTE | REACTANTS | FIRST DIMER | ENERGY          | BMK        |                   | M06        |                   | M062X/GD3   |
|-------|-----------|-------------|-----------------|------------|-------------------|------------|-------------------|-------------|
|       |           |             |                 | 6-31G(d,p) | 6-311++G(2df,2pd) | 6-31G(d,p) | 6-311++G(2df,2pd) | aug-cc-pVTZ |
| I     | 2FP + 2Cl | → P13 +2HCl | $\Delta E$      | -81.8      | -87.3             | -84.0      | -88.5             | -87.8       |
|       |           |             | $\Delta(E+ZPE)$ | -84.4      | -89.9             | -86.6      | -91.0             | -90.4       |
|       |           |             | $\Delta H$      | -84.2      | -89.6             | -86.4      | -90.7             | -90.2       |
|       |           |             | $\Delta G$      | -75.3      | -80.8             | -77.5      | -81.9             | -81.2       |
| II    | 2FP + 2Cl | → P14       | $\Delta E$      | -129.7     | -125.2            | -130.7     | -126.6            | -126.1      |
|       |           |             | $\Delta(E+ZPE)$ | -122.0     | -118.0            | -124.0     | -119.9            | -119.6      |
|       |           |             | $\Delta H$      | -124.3     | -120.2            | -126.1     | -122.1            | -121.5      |
|       |           |             | $\Delta G$      | -91.8      | -88.1             | -94.1      | -90.0             | -90.8       |
| III   | 2FP + 2Cl | → P15       | $\Delta E$      | -137.0     | -133.4            | -138.3     | -135.0            | -134.0      |
|       |           |             | $\Delta(E+ZPE)$ | -130.3     | -126.7            | -131.9     | -128.6            | -127.5      |
|       |           |             | $\Delta H$      | -132.3     | -128.7            | -133.9     | -130.6            | -129.5      |
|       |           |             | $\Delta G$      | -101.5     | -97.8             | -103.1     | -99.8             | -98.5       |

C. Energies for the products of the dimerization processes.

| ROUTE | REACTANTS                   | DIMERS         | ENERGY   | BMK        |                   | M06        |                   | M062X/GD3   |
|-------|-----------------------------|----------------|----------|------------|-------------------|------------|-------------------|-------------|
|       |                             |                |          | 6-31G(d,p) | 6-311++G(2df,2pd) | 6-31G(d,p) | 6-311++G(2df,2pd) | aug-cc-pVTZ |
| I.a   | 2FP + 2Cl + O <sub>2</sub>  | → P9 + 2HCl    | ΔE       | -90.0      | -95.4             | -94.0      | -98.6             | -88.3       |
|       |                             |                | Δ(E+ZPE) | -90.1      | -95.4             | -94.4      | -98.8             | -88.9       |
|       |                             |                | ΔH       | -90.5      | -95.8             | -94.8      | -99.2             | -90.7       |
|       |                             |                | ΔG       | -71.6      | -76.9             | -75.8      | -80.0             | -67.8       |
| I.b   | 2FP + 2Cl + 2O <sub>2</sub> | → 2P1+P10+2HCl | ΔE       | -258.7     | -265.6            | -262.6     | -271.8            | -256.2      |
|       |                             |                | Δ(E+ZPE) | -261.2     | -268.3            | -265.6     | -274.6            | -259.2      |
|       |                             |                | ΔH       | -260.7     | -267.7            | -265.0     | -274.1            | -258.7      |
|       |                             |                | ΔG       | -253.5     | -260.5            | -257.9     | -266.9            | -251.3      |
| II.a  | 2FP + 2Cl + O <sub>2</sub>  | → P7           | ΔE       | -159.8     | -153.9            | -162.4     | -157.2            | -156.0      |
|       |                             |                | Δ(E+ZPE) | -149.9     | -144.5            | -153.3     | -148.3            | -146.9      |
|       |                             |                | ΔH       | -152.9     | -147.3            | -156.1     | -151.1            | -149.7      |
|       |                             |                | ΔG       | -110.4     | -105.2            | -113.8     | -108.8            | -107.6      |
| II.b  | 2FP + 2Cl + O <sub>2</sub>  | → 2P3 + P12    | ΔE       | -220.7     | -221.1            | -220.0     | -222.6            | -211.0      |
|       |                             |                | Δ(E+ZPE) | -215.3     | -215.9            | -215.0     | -217.6            | -206.3      |
|       |                             |                | ΔH       | -217.1     | -217.6            | -216.8     | -219.4            | -208.9      |
|       |                             |                | ΔG       | -201.3     | -202.0            | -201.0     | -203.7            | -191.4      |

| ROUTE | REACTANTS                   | DIMERS | ENERGY    | BMK        |                   | M06        |                   | M062X/GD3   |        |
|-------|-----------------------------|--------|-----------|------------|-------------------|------------|-------------------|-------------|--------|
|       |                             |        |           | 6-31G(d,p) | 6-311++G(2df,2pd) | 6-31G(d,p) | 6-311++G(2df,2pd) | aug-cc-pVTZ |        |
| II.c  | 2FP + 2Cl + 2O <sub>2</sub> | →      | 2P3 + P5  | ΔE         | -229.1            | -229.8     | -229.9            | -233.0      | -220.3 |
|       |                             |        |           | Δ(E+ZPE)   | -221.2            | -222.1     | -222.5            | -225.7      | -213.1 |
|       |                             |        |           | ΔH         | -223.6            | -224.4     | -224.9            | -228.0      | -216.7 |
|       |                             |        |           | ΔG         | -197.7            | -198.7     | -198.8            | -202.0      | -188.0 |
| III.a | 2FP + 2Cl + O <sub>2</sub>  | →      | P8        | ΔE         | -147.5            | -143.7     | -149.7            | -146.6      | -141.9 |
|       |                             |        |           | Δ(E+ZPE)   | -138.1            | -134.5     | -140.8            | -137.7      | -133.0 |
|       |                             |        |           | ΔH         | -140.8            | -137.1     | -143.5            | -140.4      | -136.3 |
|       |                             |        |           | ΔG         | -99.7             | -95.9      | -102.4            | -99.2       | -92.7  |
| III.b | 2FP + 2Cl + O <sub>2</sub>  | →      | 2P1 + P11 | ΔE         | -166.5            | -167.7     | -169.0            | -172.1      | -163.1 |
|       |                             |        |           | Δ(E+ZPE)   | -164.3            | -165.7     | -167.5            | -170.7      | -161.5 |
|       |                             |        |           | ΔH         | -165.3            | -166.7     | -168.4            | -171.6      | -162.5 |
|       |                             |        |           | ΔG         | -146.1            | -147.6     | -149.4            | -152.6      | -143.4 |
| III.c | 2FP + 2Cl + 2O <sub>2</sub> | →      | 2P1 + P6  | ΔE         | -193.1            | -192.7     | -197.3            | -197.8      | -190.4 |
|       |                             |        |           | Δ(E+ZPE)   | -188.5            | -188.3     | -193.1            | -194.1      | -186.2 |
|       |                             |        |           | ΔH         | -190.4            | -190.1     | -195.0            | -195.8      | -188.0 |
|       |                             |        |           | ΔG         | -160.0            | -160.1     | -164.2            | -165.9      | -157.9 |



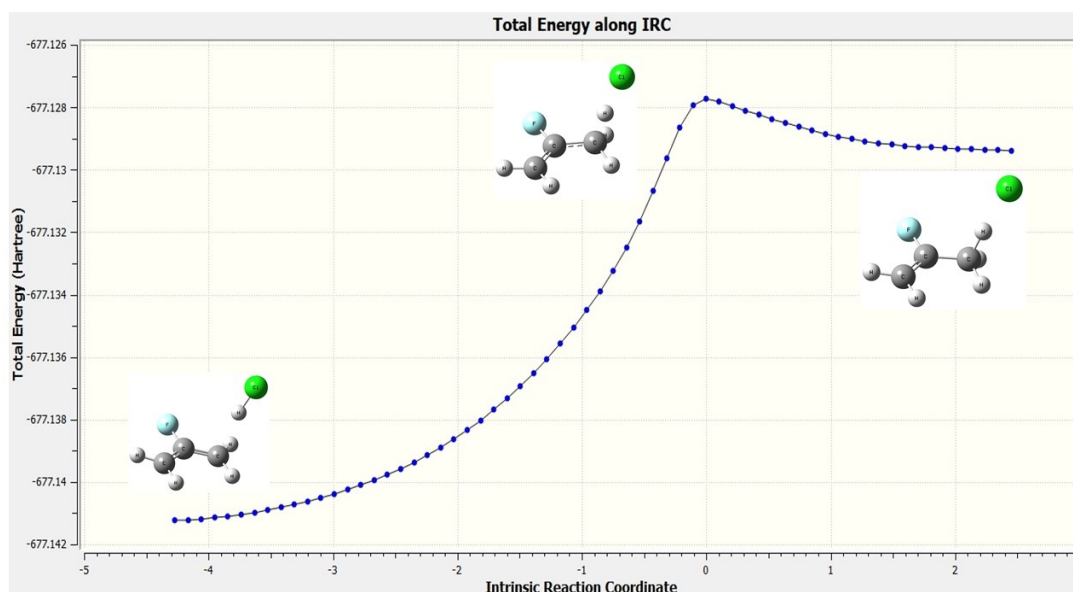

a) Figure S 1. Change in energy and the intrinsic reaction coordinate (IRC) relative to the **TS\_E1**.

| <i>RxCoord</i> | <i>R. Energy</i> | <i>RxCoord</i> | <i>R. Energy</i> | <i>RxCoord</i> | <i>R. Energy</i> |
|----------------|------------------|----------------|------------------|----------------|------------------|
| -4.27223       | -0.01352         | -1.92138       | -0.01063         | -0.00053       | 0.42185          |
| -4.16546       | -0.01350         | -1.81451       | -0.01031         | -0.00067       | 0.52872          |
| -4.05863       | -0.01347         | -1.70765       | -0.00998         | -0.00080       | 0.63559          |
| -3.95178       | -0.01343         | -1.60079       | -0.00961         | -0.00092       | 0.74246          |
| -3.84492       | -0.01338         | -1.49393       | -0.00922         | -0.00103       | 0.84933          |
| -3.73806       | -0.01332         | -1.38707       | -0.00880         | -0.00113       | 0.95620          |
| -3.63119       | -0.01326         | -1.28021       | -0.00834         | -0.00122       | 1.06307          |
| -3.52433       | -0.01319         | -1.17336       | -0.00786         | -0.00130       | 1.16993          |
| -3.41746       | -0.01311         | -1.06653       | -0.00734         | -0.00137       | 1.27678          |
| -3.31059       | -0.01301         | -0.95974       | -0.00678         | -0.00143       | 1.38363          |
| -3.20372       | -0.01291         | -0.85300       | -0.00618         | -0.00148       | 1.49047          |
| -3.09686       | -0.01280         | -0.74634       | -0.00553         | -0.00152       | 1.59725          |
| -2.99000       | -0.01267         | -0.63983       | -0.00479         | -0.00155       | 1.70385          |
| -2.88314       | -0.01254         | -0.53352       | -0.00394         | -0.00157       | 1.81017          |
| -2.77628       | -0.01239         | -0.42699       | -0.00297         | -0.00159       | 1.91654          |
| -2.66943       | -0.01223         | -0.32029       | -0.00193         | -0.00161       | 2.02318          |
| -2.56257       | -0.01205         | -0.21350       | -0.00094         | -0.00163       | 2.12998          |
| -2.45570       | -0.01186         | -0.10669       | -0.00022         | -0.00165       | 2.23684          |
| -2.34884       | -0.01165         | <b>0.00000</b> | <b>0.00000</b>   | -0.00166       | 2.34371          |
| -2.24198       | -0.01143         | 0.10389        | -0.00010         | -0.00168       | 2.45058          |
| -2.13511       | -0.01118         | 0.20833        | -0.00024         |                |                  |
| -2.02824       | -0.01091         | 0.31513        | -0.00039         |                |                  |

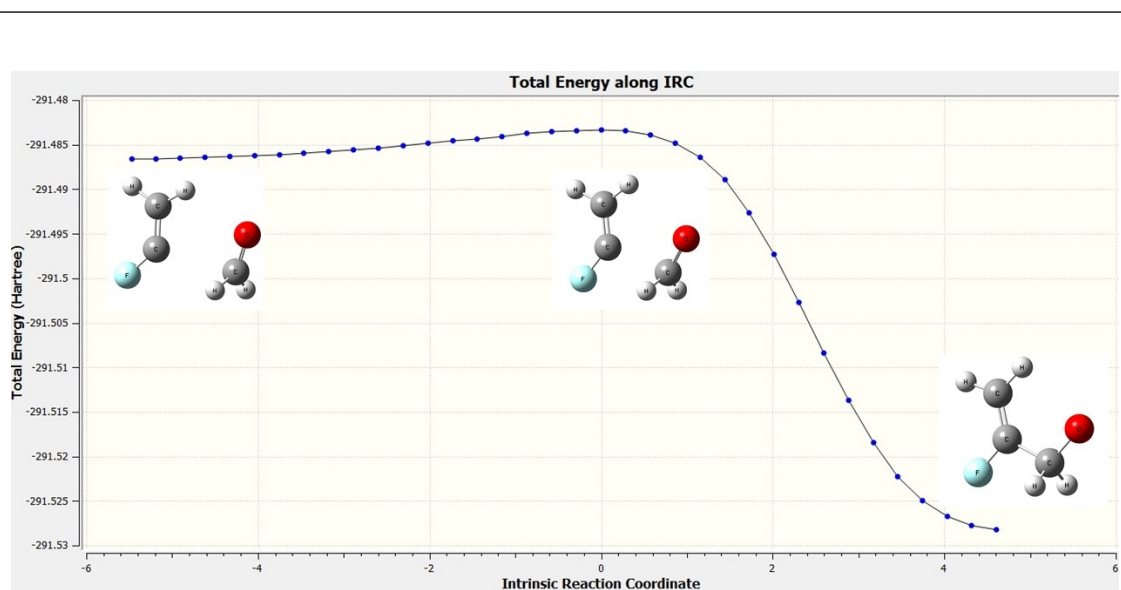

b) Figure S 2. Change in energy and the intrinsic reaction coordinate (IRC) relative to the **TS\_E10**.

| <i>RxCoord</i> | <i>R. Energy</i> | <i>RxCoord</i> | <i>R. Energy</i> | <i>RxCoord</i> | <i>R. Energy</i> |
|----------------|------------------|----------------|------------------|----------------|------------------|
| -5.47293       | -0.00328         | -2.01920       | -0.00153         | 1.44178        | -0.00562         |
| -5.18953       | -0.00324         | -1.73057       | -0.00125         | 1.73038        | -0.00927         |
| -4.90438       | -0.00318         | -1.44204       | -0.00100         | 2.01903        | -0.01397         |
| -4.61587       | -0.00311         | -1.15358       | -0.00072         | 2.30767        | -0.01937         |
| -4.32728       | -0.00301         | -0.86526       | -0.00042         | 2.59627        | -0.02501         |
| -4.03879       | -0.00290         | -0.57665       | -0.00018         | 2.88482        | -0.03039         |
| -3.75043       | -0.00276         | -0.28810       | -0.00005         | 3.17323        | -0.03512         |
| -3.46184       | -0.00259         | 0.00000        | 0.00000          | 3.46140        | -0.03892         |
| -3.17325       | -0.00242         | 0.28789        | -0.00011         | 3.74872        | -0.04164         |
| -2.88463       | -0.00224         | 0.57623        | -0.00055         | 4.03500        | -0.04339         |
| -2.59613       | -0.00205         | 0.86479        | -0.00147         | 4.32225        | -0.04444         |
| -2.30769       | -0.00181         | 1.15321        | -0.00307         | 4.60813        | -0.04490         |

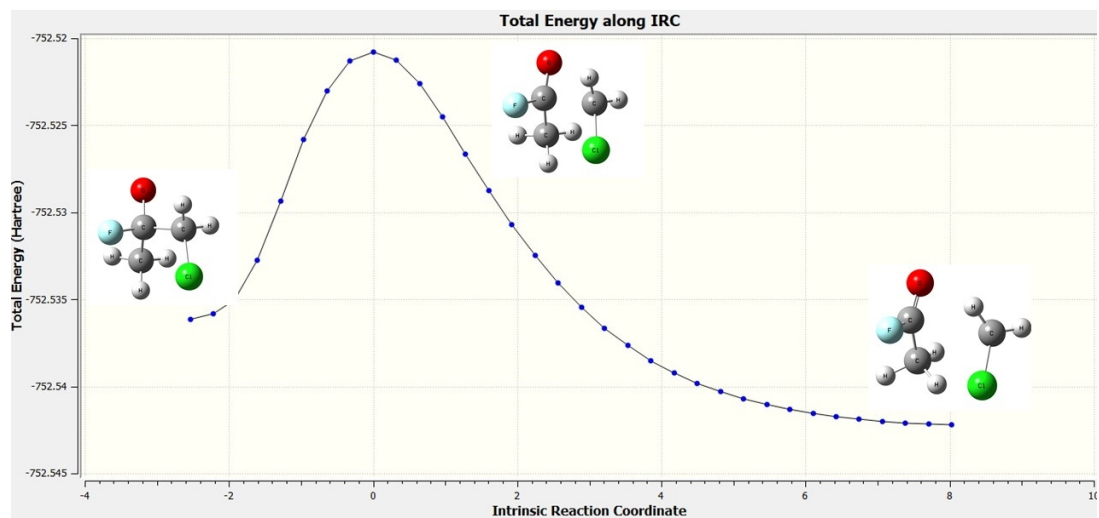

c) Figure S 3. Change in energy and the intrinsic reaction coordinate (IRC) relative to the **TS\_A101**.

| <i>RxCoord</i> | <i>R. Energy</i> | <i>RxCoord</i> | <i>R. Energy</i> | <i>RxCoord</i> | <i>R. Energy</i> |
|----------------|------------------|----------------|------------------|----------------|------------------|
| -2.53639       | -0.01537         | 1.28481        | -0.00588         | 5.13932        | -0.01994         |
| -2.22120       | -0.01506         | 1.60601        | -0.00799         | 5.46046        | -0.02027         |
| -1.92520       | -0.01427         | 1.92721        | -0.00995         | 5.78144        | -0.02054         |
| -1.60605       | -0.01200         | 2.24843        | -0.01172         | 6.10258        | -0.02077         |
| -1.28499       | -0.00857         | 2.56964        | -0.01331         | 6.42349        | -0.02096         |
| -0.96376       | -0.00505         | 2.89087        | -0.01469         | 6.74401        | -0.02112         |
| -0.64249       | -0.00224         | 3.21214        | -0.01588         | 7.06468        | -0.02124         |
| -0.32130       | -0.00054         | 3.53343        | -0.01689         | 7.38399        | -0.02133         |
| 0.00000        | 0.00000          | 3.85470        | -0.01775         | 7.70428        | -0.02140         |
| 0.32128        | -0.00048         | 4.17594        | -0.01846         | 8.02420        | -0.02145         |
| 0.64244        | -0.00182         | 4.49712        | -0.01905         |                |                  |
| 0.96368        | -0.00375         | 4.81829        | -0.01954         |                |                  |

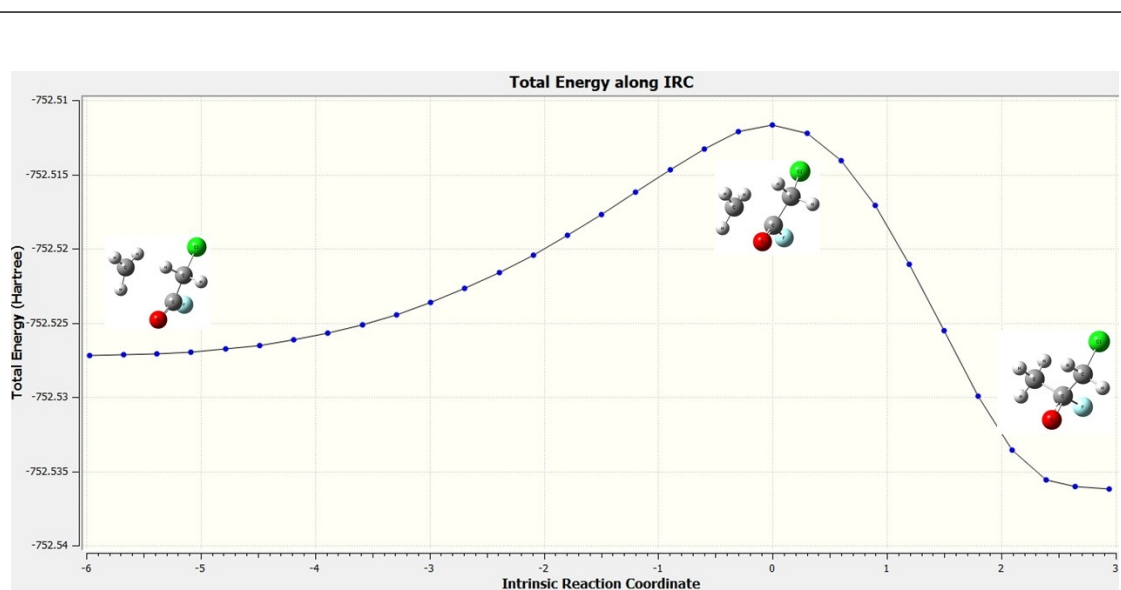

d) Figure S 4. Change in energy and the intrinsic reaction coordinate (IRC) relative to the **TS\_A102**.

| <i>RxCoord</i> | <i>R. Energy</i> | <i>RxCoord</i> | <i>R. Energy</i> | <i>RxCoord</i> | <i>R. Energy</i> |
|----------------|------------------|----------------|------------------|----------------|------------------|
| -5.96838       | -0.01554         | -2.39192       | -0.00996         | 1.19615        | -0.00939         |
| -5.67584       | -0.01549         | -2.09291       | -0.00876         | 1.49520        | -0.01388         |
| -5.38059       | -0.01543         | -1.79389       | -0.00744         | 1.79421        | -0.01829         |
| -5.08276       | -0.01531         | -1.49487       | -0.00603         | 2.09302        | -0.02190         |
| -4.78406       | -0.01512         | -1.19584       | -0.00454         | 2.38979        | -0.02391         |
| -4.48518       | -0.01485         | -0.89685       | -0.00303         | 2.64771        | -0.02438         |
| -4.18621       | -0.01450         | -0.59785       | -0.00161         | 2.94166        | -0.02454         |
| -3.88714       | -0.01404         | -0.29900       | -0.00048         |                |                  |
| -3.58810       | -0.01347         | 0.00000        | 0.00000          |                |                  |
| -3.28906       | -0.01279         | 0.29908        | -0.00059         |                |                  |
| -2.99000       | -0.01198         | 0.59805        | -0.00241         |                |                  |
| -2.69095       | -0.01104         | 0.89710        | -0.00543         |                |                  |

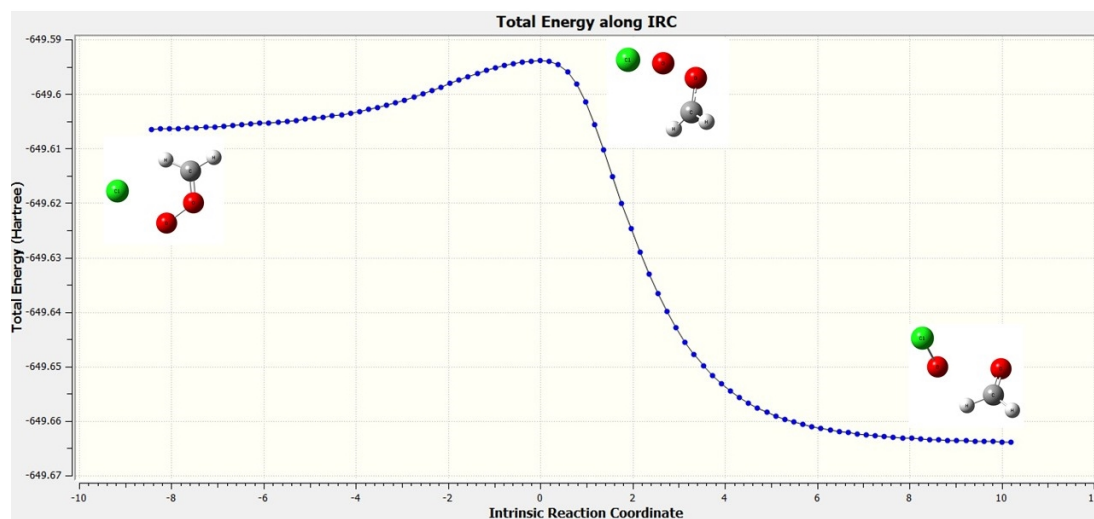

e) Figure S 5. Change in energy and the intrinsic reaction coordinate (IRC) relative to the **TS\_CIO2**.

| <i>RxCoord</i> | <i>Energy</i> | <i>RxCoord</i> | <i>Energy</i> | <i>RxCoord</i> | <i>Energy</i> | <i>RxCoord</i> | <i>Energy</i> |
|----------------|---------------|----------------|---------------|----------------|---------------|----------------|---------------|
| -8.435         | -0.013        | -3.726         | -0.009        | 0.980          | -0.008        | 5.691          | -0.067        |
| -8.239         | -0.013        | -3.530         | -0.009        | 1.176          | -0.012        | 5.887          | -0.067        |
| -8.043         | -0.012        | -3.334         | -0.008        | 1.372          | -0.016        | 6.084          | -0.067        |
| -7.847         | -0.012        | -3.138         | -0.008        | 1.568          | -0.021        | 6.280          | -0.068        |
| -7.651         | -0.012        | -2.941         | -0.007        | 1.765          | -0.026        | 6.476          | -0.068        |
| -7.454         | -0.012        | -2.745         | -0.007        | 1.961          | -0.031        | 6.672          | -0.068        |
| -7.258         | -0.012        | -2.549         | -0.006        | 2.157          | -0.035        | 6.869          | -0.068        |
| -7.062         | -0.012        | -2.352         | -0.005        | 2.354          | -0.039        | 7.065          | -0.069        |
| -6.865         | -0.012        | -2.156         | -0.005        | 2.550          | -0.043        | 7.261          | -0.069        |
| -6.669         | -0.012        | -1.960         | -0.004        | 2.746          | -0.046        | 7.457          | -0.069        |
| -6.473         | -0.012        | -1.763         | -0.004        | 2.943          | -0.049        | 7.654          | -0.069        |
| -6.277         | -0.012        | -1.567         | -0.003        | 3.139          | -0.052        | 7.850          | -0.069        |
| -6.080         | -0.011        | -1.371         | -0.002        | 3.335          | -0.054        | 8.046          | -0.069        |
| -5.884         | -0.011        | -1.175         | -0.002        | 3.532          | -0.056        | 8.242          | -0.069        |
| -5.688         | -0.011        | -0.978         | -0.001        | 3.728          | -0.058        | 8.439          | -0.069        |
| -5.492         | -0.011        | -0.782         | -0.001        | 3.924          | -0.059        | 8.635          | -0.070        |
| -5.296         | -0.011        | -0.586         | -0.001        | 4.121          | -0.061        | 8.831          | -0.070        |
| -5.100         | -0.011        | -0.390         | 0.000         | 4.317          | -0.062        | 9.028          | -0.070        |
| -4.903         | -0.011        | -0.195         | 0.000         | 4.513          | -0.063        | 9.224          | -0.070        |
| -4.707         | -0.010        | 0.000          | 0.000         | 4.710          | -0.064        | 9.420          | -0.070        |
| -4.511         | -0.010        | 0.195          | 0.000         | 4.906          | -0.064        | 9.616          | -0.070        |
| -4.315         | -0.010        | 0.391          | -0.001        | 5.102          | -0.065        | 9.812          | -0.070        |
| -4.118         | -0.010        | 0.587          | -0.002        | 5.299          | -0.066        | 10.008         | -0.070        |
| -3.922         | -0.009        | 0.783          | -0.004        | 5.495          | -0.066        | 10.204         | -0.070        |

|        |        |        |        |       |        |       |        |
|--------|--------|--------|--------|-------|--------|-------|--------|
| -8.435 | -0.013 | -3.726 | -0.009 | 0.980 | -0.008 | 5.691 | -0.067 |
| -8.239 | -0.013 | -3.530 | -0.009 | 1.176 | -0.012 | 5.887 | -0.067 |

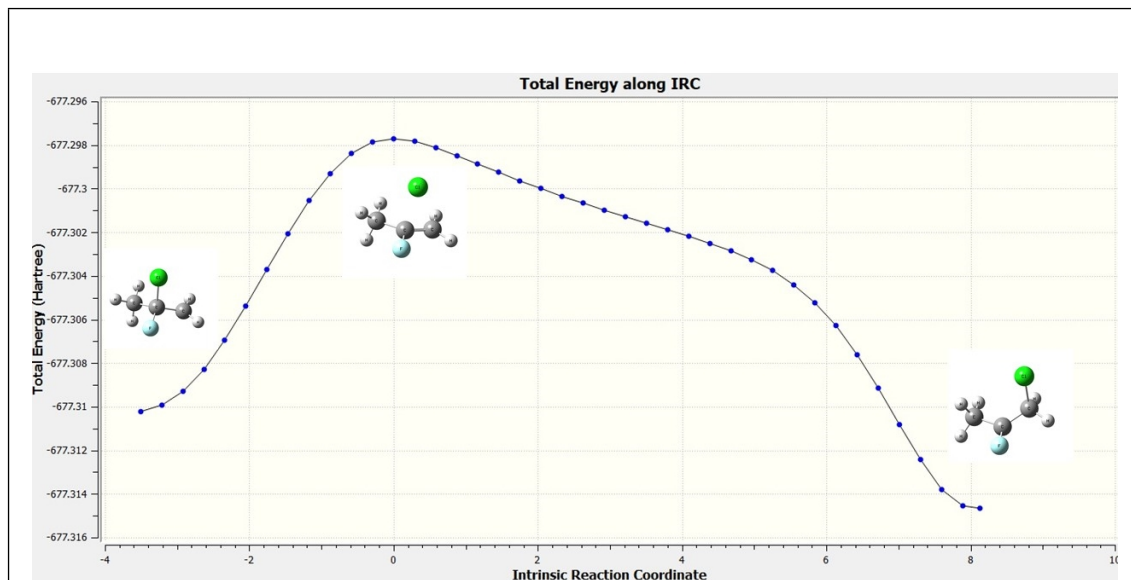

f) Figure S 6. Change in energy and the intrinsic reaction coordinate (IRC) relative to the **TS\_A1A2**.

| <i>RxCoord</i> | <i>R. Energy</i> | <i>RxCoord</i> | <i>R. Energy</i> | <i>RxCoord</i> | <i>R. Energy</i> |
|----------------|------------------|----------------|------------------|----------------|------------------|
| -3.501         | -0.012           | 0.584          | 0.000            | 4.67451        | -0.005           |
| -3.212         | -0.012           | 0.876          | -0.001           | 4.96658        | -0.006           |
| -2.921         | -0.012           | 1.168          | -0.001           | 5.25858        | -0.006           |
| -2.630         | -0.011           | 1.460          | -0.002           | 5.55061        | -0.007           |
| -2.338         | -0.009           | 1.752          | -0.002           | 5.84269        | -0.008           |
| -2.045         | -0.008           | 2.044          | -0.002           | 6.13483        | -0.009           |
| -1.753         | -0.006           | 2.337          | -0.003           | 6.42702        | -0.010           |
| -1.461         | -0.004           | 2.629          | -0.003           | 6.71924        | -0.011           |
| -1.169         | -0.003           | 2.921          | -0.003           | 7.01148        | -0.013           |
| -0.877         | -0.002           | 3.213          | -0.004           | 7.30373        | -0.015           |
| -0.584         | -0.001           | 3.50574        | -0.004           | 7.59594        | -0.016           |
| -0.292         | 0.000            | 3.79799        | -0.004           | 7.88735        | -0.017           |
| 0.000          | 0.000            | 4.09020        | -0.004           | 8.12383        | -0.017           |
| 0.292          | 0.000            | 4.38239        | -0.005           |                |                  |

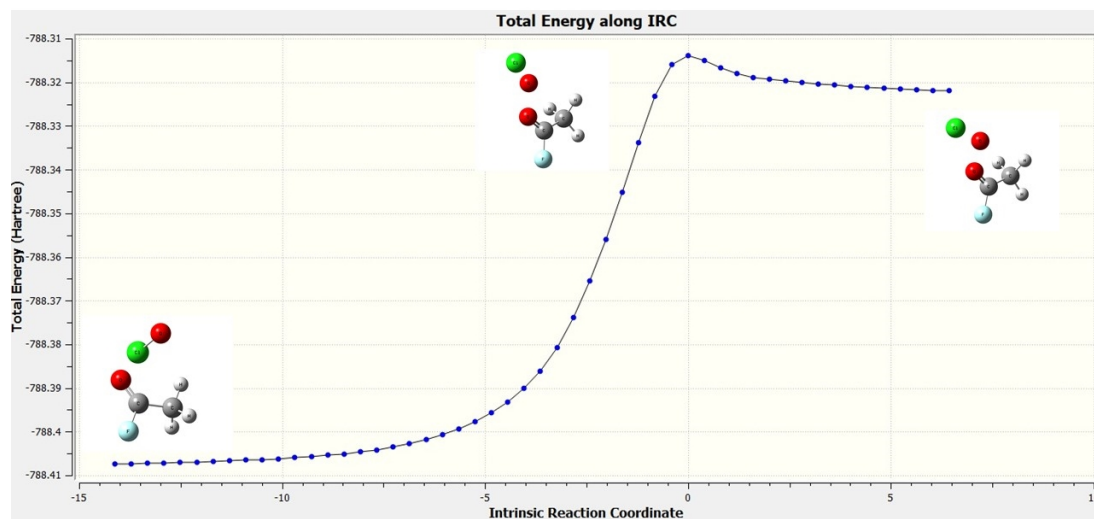

g) Figure S 7. Change in energy and the intrinsic reaction coordinate (IRC) relative to the **TS\_CIFetrO2**.

| <i>RxCoord</i> | <i>R. Energy</i> | <i>RxCoord</i> | <i>R. Energy</i> | <i>RxCoord</i> | <i>R. Energy</i> |
|----------------|------------------|----------------|------------------|----------------|------------------|
| -14.121        | -0.094           | -6.85976       | -0.089           | 0.40319        | -0.001           |
| -13.718        | -0.093           | -6.45608       | -0.088           | 0.80501        | -0.003           |
| -13.314        | -0.093           | -6.05239       | -0.087           | 1.20627        | -0.004           |
| -12.911        | -0.093           | -5.64864       | -0.086           | 1.60454        | -0.005           |
| -12.507        | -0.093           | -5.24493       | -0.084           | 1.99778        | -0.005           |
| -12.104        | -0.093           | -4.84115       | -0.082           | 2.40023        | -0.006           |
| -11.700        | -0.093           | -4.43744       | -0.079           | 2.80382        | -0.006           |
| -11.296        | -0.093           | -4.03433       | -0.076           | 3.20760        | -0.006           |
| -10.893        | -0.093           | -3.63243       | -0.072           | 3.61144        | -0.007           |
| -10.490        | -0.092           | -3.22982       | -0.067           | 4.01528        | -0.007           |
| -10.086        | -0.092           | -2.82629       | -0.060           | 4.41915        | -0.007           |
| -9.683         | -0.092           | -2.42252       | -0.052           | 4.82300        | -0.007           |
| -9.280         | -0.092           | -2.01870       | -0.042           | 5.22688        | -0.008           |
| -8.877         | -0.092           | -1.61491       | -0.031           | 5.63073        | -0.008           |
| -8.47354       | -0.091           | -1.21116       | -0.020           | 6.03461        | -0.008           |
| -8.07061       | -0.091           | -0.80740       | -0.009           | 6.43838        | -0.008           |
| -7.66697       | -0.090           | -0.40365       | -0.002           |                |                  |

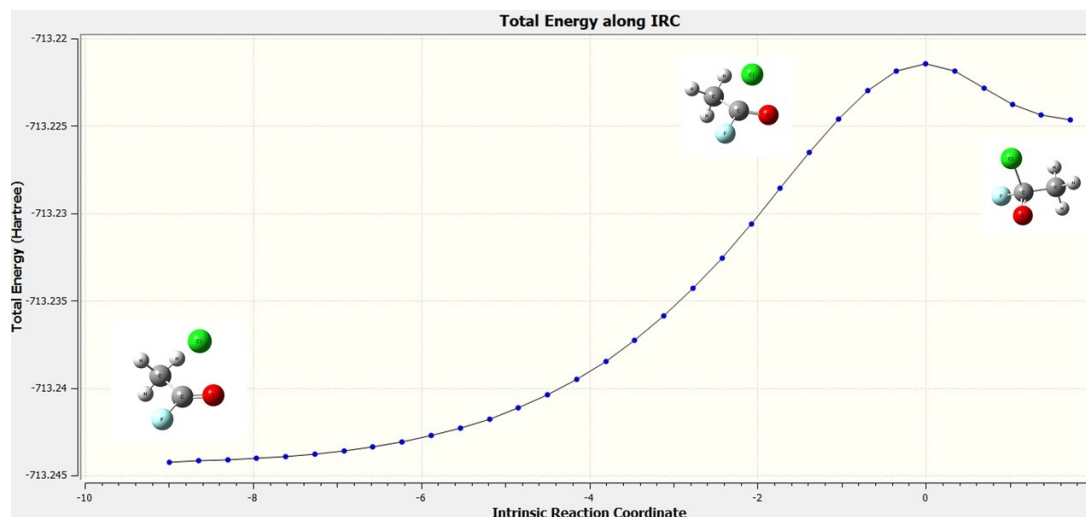

**h) Figure S 8. Change in energy and the intrinsic reaction coordinate (IRC) relative to the TS\_CIFetrO.**

| <i>RxCoord</i> | <i>R. Energy</i> | <i>RxCoord</i> | <i>R. Energy</i> | <i>RxCoord</i> | <i>R. Energy</i> |
|----------------|------------------|----------------|------------------|----------------|------------------|
| -8.993         | -0.02278         | -5.189         | -0.02032         | -1.38353       | -0.00505         |
| -8.647         | -0.02273         | -4.843         | -0.01969         | -1.03766       | -0.00314         |
| -8.302         | -0.02266         | -4.497         | -0.01895         | -0.69172       | -0.00153         |
| -7.956         | -0.02258         | -4.15116       | -0.01806         | -0.34589       | -0.00041         |
| -7.611         | -0.02247         | -3.80510       | -0.01703         | 0.00000        | 0.00000          |
| -7.265         | -0.02234         | -3.45905       | -0.01583         | 0.34588        | -0.00040         |
| -6.919         | -0.02215         | -3.11303       | -0.01444         | 0.69134        | -0.00136         |
| -6.573         | -0.02192         | -2.76707       | -0.01286         | 1.03547        | -0.00233         |
| -6.227         | -0.02163         | -2.42117       | -0.01110         | 1.37469        | -0.00290         |
| -5.881         | -0.02128         | -2.07530       | -0.00916         | 1.71791        | -0.00319         |
| -5.535         | -0.02084         | -1.72944       | -0.00711         |                |                  |



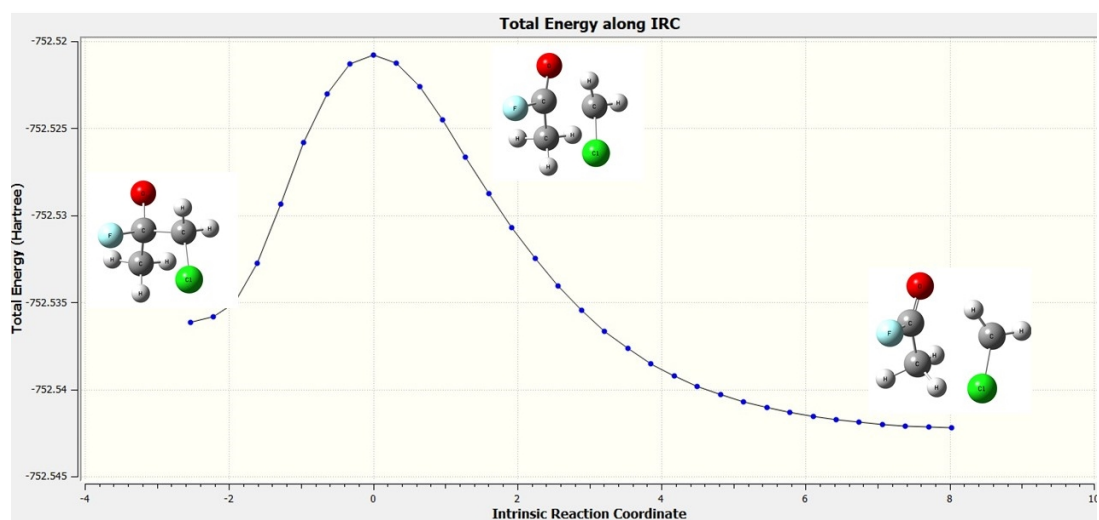

i) Figure S 9. Change in energy and the intrinsic reaction coordinate (IRC) relative to the **TS\_A20**.

| <i>RxCoord</i> | <i>R. Energy</i> | <i>RxCoord</i> | <i>R. Energy</i> | <i>RxCoord</i> | <i>R. Energy</i> |
|----------------|------------------|----------------|------------------|----------------|------------------|
| -2.0997        | -0.0175          | 1.2032         | -0.0019          | 4.5134         | -0.0056          |
| -1.8054        | -0.0121          | 1.5040         | -0.0025          | 4.8142         | -0.0057          |
| -1.5044        | -0.0083          | 1.8048         | -0.0030          | 5.1149         | -0.0058          |
| -1.2034        | -0.0049          | 2.1058         | -0.0035          | 5.4154         | -0.0059          |
| -0.9026        | -0.0025          | 2.4067         | -0.0039          | 5.7159         | -0.0060          |
| -0.6017        | -0.0010          | 2.7077         | -0.0043          | 6.0164         | -0.0060          |
| -0.3009        | -0.0002          | 3.0087         | -0.0046          | 6.3171         | -0.0061          |
| 0.0000         | 0.0000           | 3.3097         | -0.0048          | 6.6178         | -0.0061          |
| 0.3009         | -0.0002          | 3.6106         | -0.0051          | 6.9186         | -0.0062          |
| 0.6017         | -0.0007          | 3.9116         | -0.0053          |                |                  |
| 0.9025         | -0.0013          | 4.2125         | -0.0055          |                |                  |
